# Supplementary material for: Iron carbonyl cluster-incorporated Cu(i) NHC complexes in homocoupling of arylboronic acids: an effective [TeFe3(CO)9]2−ligand
Source: Royal Society of Chemistry journal article supplement (doi:10.1039/c5dt03242c), 2015-01-01
Supplement: c5dt03242c1.pdf [file c5dt03242c1.pdf]

**Supporting information for**

**Iron carbonyl cluster-incorporated Cu(I) NHC complexes in homocoupling  
of arylboronic acids: an effective  $[\text{TeFe}_3(\text{CO})_9]^{2-}$  ligand**

Chien-Nan Lin,<sup>a</sup> Chung-Yi Huang,<sup>a</sup> Chia-Chi Yu,<sup>a</sup> Yen-Ming Chen,<sup>a</sup> Wei-Ming Ke,<sup>a</sup>

Guan-Jung Wang,<sup>a</sup> Gon-Ann Lee\*<sup>b</sup> and Minghuey Shieh\*<sup>a</sup>

Department of Chemistry, National Taiwan Normal University, Taipei 11677, Taiwan,

Republic of China

Department of Chemistry, Fu Jen Catholic University, Xinzhuang, New Taipei 24205, Taiwan,

Republic of China

## Contents

|                                                                                                                                                                                                       |         |
|-------------------------------------------------------------------------------------------------------------------------------------------------------------------------------------------------------|---------|
| <b>Experimental Section</b>                                                                                                                                                                           | S2-S8   |
| <b>Optimization of [TeFe<sub>3</sub>(CO)<sub>9</sub>Cu<sub>2</sub>(MeCN)<sub>2</sub>]- and 1–4-Catalyzed Homocoupling of 4-Bromophenylboronic Acid</b>                                                | S9-S10  |
| <b>Electrochemical Measurements</b>                                                                                                                                                                   | S10-S11 |
| <b>X-ray Structural Characterization of 1–4</b>                                                                                                                                                       | S11-S12 |
| <b>Explanations for the Checkcif Alert</b>                                                                                                                                                            | S13     |
| <b>Computational Details</b>                                                                                                                                                                          | S14     |
| <b>References</b>                                                                                                                                                                                     | S15-S18 |
| <b>Table S1.</b> [TeFe <sub>3</sub> (CO) <sub>9</sub> Cu <sub>2</sub> (MeCN) <sub>2</sub> ]- and 1–4-catalyzed homocoupling of 4-bromophenylboronic acid: the optimization of the reaction conditions | S19     |
| <b>Table S2.</b> The reported catalytic systems for homocoupling of 4-bromophenylboronic acid                                                                                                         | S20     |
| <b>Table S3.</b> Results of natural bond order of [TeFe <sub>3</sub> (CO) <sub>9</sub> Cu <sub>2</sub> (MeCN) <sub>2</sub> ] and 1–4                                                                  | S21     |
| <b>Table S4.</b> Differential pulse voltammetry of [TeFe <sub>3</sub> (CO) <sub>9</sub> Cu <sub>2</sub> (MeCN) <sub>2</sub> ] and 1–4                                                                 | S22     |
| <b>Table S5.</b> Crystallographic data for 1–4                                                                                                                                                        | S23     |
| <b>Table S6.</b> Selected bond distances and bond angles for 1–4                                                                                                                                      | S24-S26 |
| <b>Table S7.</b> Electronic energy and cartesian coordinates of 1                                                                                                                                     | S27-S28 |
| <b>Table S8.</b> Electronic energy and cartesian coordinates of 2                                                                                                                                     | S29-S30 |
| <b>Table S9.</b> Electronic energy and cartesian coordinates of 3                                                                                                                                     | S31-S32 |
| <b>Table S10.</b> Electronic energy and cartesian coordinates of 4                                                                                                                                    | S33-S34 |
| <b>Figure S1.</b> PXRD patterns for crystals of 1 exposure to air for 10 days                                                                                                                         | S35     |
| <b>Figure S2.</b> ORTEP diagram of 2                                                                                                                                                                  | S36     |
| <b>Figure S3.</b> ORTEP diagram of 3                                                                                                                                                                  | S37     |
| <b>Figure S4.</b> ORTEP diagram of 4                                                                                                                                                                  | S38     |
| <b>Figure S5.</b> The proposed mechanism for the homocoupling of 4-bromophenylboronic acid                                                                                                            | S39     |
| <b>Figure S6.</b> Spatial graphs of frontier molecular orbitals for [TeFe <sub>3</sub> (CO) <sub>9</sub> Cu <sub>2</sub> (MeCN) <sub>2</sub> ] and 1–4                                                | S40     |
| <b>Figure S7.</b> Correlation of product ratios with the Hammett equation                                                                                                                             | S41     |
| <b>Spectroscopic Data of Products</b>                                                                                                                                                                 | S42-S50 |

## Experimental Section

All reactions were performed under an atmosphere of pure nitrogen using standard Schlenk techniques.<sup>1</sup> Solvents were purified, dried, and distilled under nitrogen prior to use. KO<sup>t</sup>Bu, 3-nitrophenylboronic acid, 4-methoxyphenylboronic acid (all ACROS), 2-bromophenylboronic acid (AK Scientific), 3-bromophenylboronic acid (AK Scientific), 4-bromophenylboronic acid (Lancaster), and 4-nitrophenylboronic acid (Lancaster) were used as received. [Et<sub>4</sub>N]<sub>2</sub>[TeFe<sub>3</sub>(CO)<sub>9</sub>],<sup>2</sup> [Cu(MeCN)<sub>4</sub>][BF<sub>4</sub>],<sup>3</sup> [TeFe<sub>3</sub>(CO)<sub>9</sub>Cu<sub>2</sub>(MeCN)<sub>2</sub>],<sup>4</sup> [Cu<sub>2</sub>(MeIm(CH<sub>2</sub>)<sub>2</sub>ImMe)<sub>2</sub>][PF<sub>6</sub>]<sub>2</sub>,<sup>5</sup> and the imidazolium salts, 1,3-dimethylimidazolium iodide (Me<sub>2</sub>Im·HI),<sup>6a</sup> 1,1'-dimethyl-3,3'-methylene-diimidazolium diiodide (MeImCH<sub>2</sub>ImMe·H<sub>2</sub>I<sub>2</sub>),<sup>6b</sup> 1,1'-dimethyl-3,3'-ethylene-diimidazolium dibromide (MeIm(CH<sub>2</sub>)<sub>2</sub>ImMe·H<sub>2</sub>Br<sub>2</sub>),<sup>6a</sup> and 1,1'-dimethyl-3,3'-propylene-diimidazolium diiodide (MeIm(CH<sub>2</sub>)<sub>3</sub>ImMe·H<sub>2</sub>I<sub>2</sub>)<sup>6c</sup> were prepared according to the published methods. Chromatographic purification of compounds was achieved with Merck 60 silica gel (40–63 μm). Analytical thin layer chromatography (TLC) was performed on Silica Gel 60 F254 precoated plates. Infrared spectra were recorded on a Perkin-Elmer Paragon 1000 IR spectrometer. The NMR spectra were obtained on a Bruker AV 400 at 400.13 MHz for <sup>1</sup>H and 100.61 MHz for <sup>13</sup>C or on a Bruker AV 500 at 500.13 MHz for <sup>1</sup>H and 125.76 MHz for <sup>13</sup>C. <sup>1</sup>H and <sup>13</sup>C chemical shifts are reported in parts per million and were calibrated relative to DMSO-*d*<sub>6</sub> (<sup>1</sup>H: 2.49 ppm, <sup>13</sup>C: 39.51 ppm) as the internal standard. Elemental analyses for

C, H, and N were performed on a Perkin-Elmer 2400 analyzer at the MOST Regional Instrumental Center at National Taiwan University, Taipei, Taiwan.

**Synthesis of [TeFe<sub>3</sub>(CO)<sub>9</sub>Cu<sub>2</sub>(Me<sub>2</sub>Im)<sub>2</sub>] (1).** A THF solution (20 mL) of [TeFe<sub>3</sub>(CO)<sub>9</sub>Cu<sub>2</sub>(MeCN)<sub>2</sub>] (0.30 g, 0.40 mmol), Me<sub>2</sub>Im · HI (0.18 g, 0.80 mmol), and KO<sup>t</sup>Bu (0.090 g, 0.80 mmol) was stirred at ambient temperature overnight. The resultant solution was filtered, and the solvent was evaporated under vacuum. The residue was washed with deionized water and hexanes several times and then extracted with CH<sub>2</sub>Cl<sub>2</sub> to give a purplish-brown solution, which was recrystallized with hexanes/MeOH/CH<sub>2</sub>Cl<sub>2</sub> to give [TeFe<sub>3</sub>(CO)<sub>9</sub>Cu<sub>2</sub>(Me<sub>2</sub>Im)<sub>2</sub>] (1) (yield 0.19 g, 0.22 mmol, 55 % based on [TeFe<sub>3</sub>(CO)<sub>9</sub>Cu<sub>2</sub>(MeCN)<sub>2</sub>]). IR ( $\nu_{\text{CO}}$ , CH<sub>2</sub>Cl<sub>2</sub>): 2031 (m), 1972 (vs), 1918 (w) cm<sup>-1</sup>. <sup>1</sup>H NMR (500 MHz, DMSO-*d*<sub>6</sub>, 300 K, ppm):  $\delta$  7.30 (s, 4H, NCH), 3.77 (s, 12H, NCH<sub>3</sub>). <sup>13</sup>C NMR (125 MHz, DMSO-*d*<sub>6</sub>, 300 K, ppm):  $\delta$  218.90 (Fe-CO), 178.20 (C<sub>carbene</sub>), 122.00 (NCH), 37.18 (NCH<sub>3</sub>). Anal. Calcd for C<sub>19</sub>H<sub>16</sub>Cu<sub>2</sub>Fe<sub>3</sub>N<sub>4</sub>O<sub>9</sub>Te: C, 26.33; H, 1.86; N, 6.47. Found: C, 26.10; H, 2.12; N, 6.48. Mp: 166 °C dec. Crystals of [TeFe<sub>3</sub>(CO)<sub>9</sub>Cu<sub>2</sub>(Me<sub>2</sub>Im)<sub>2</sub>] (1) suitable for X-ray diffraction were grown from hexanes/MeOH/CH<sub>2</sub>Cl<sub>2</sub>.

**Synthesis of [TeFe<sub>3</sub>(CO)<sub>9</sub>Cu<sub>2</sub>(MeImCH<sub>2</sub>ImMe)] (2).** *Method 1.* A THF solution (20 mL) of [TeFe<sub>3</sub>(CO)<sub>9</sub>Cu<sub>2</sub>(MeCN)<sub>2</sub>] (0.60 g, 0.79 mmol), MeImCH<sub>2</sub>ImMe · H<sub>2</sub>I<sub>2</sub> (0.34 g, 0.79 mmol), and KO<sup>t</sup>Bu (0.18 g, 1.60 mmol) was stirred at 40 °C overnight. The resultant reddish-brown solution was filtered, and the solvent was evaporated under vacuum. The

residue was extracted with Et<sub>2</sub>O to give a purplish-brown solution and evaporated under vacuum again. The solid was washed with deionized water and hexanes several times and then extracted with CH<sub>2</sub>Cl<sub>2</sub> to give a purplish-brown solution, which was recrystallized with hexanes/MeOH/CH<sub>2</sub>Cl<sub>2</sub> to give [TeFe<sub>3</sub>(CO)<sub>9</sub>Cu<sub>2</sub>(MeImCH<sub>2</sub>ImMe)] (**2**) (yield 0.14 g, 0.16 mmol, 20% based on [TeFe<sub>3</sub>(CO)<sub>9</sub>Cu<sub>2</sub>(MeCN)<sub>2</sub>]). IR ( $\nu_{\text{CO}}$ , CH<sub>2</sub>Cl<sub>2</sub>): 2033 (m), 2023 (w), 1987 (vs), 1974 (s), 1934 (w), 1892 (m) cm<sup>-1</sup>. <sup>1</sup>H NMR (400 MHz, DMSO-*d*<sub>6</sub>, 300 K, ppm):  $\delta$  7.70 (s, 2H, NCH), 7.39 (s, 2H, NCH), 6.54 (br, 1H, NCH<sub>2</sub>N), 6.40 (br, 1H, NCH<sub>2</sub>N), 3.77 (s, 6H, NCH<sub>3</sub>). <sup>13</sup>C NMR (100 MHz, DMSO-*d*<sub>6</sub>, 300 K, ppm):  $\delta$  218.27 (Fe-CO), 177.18 (C<sub>carbene</sub>), 123.40, 120.99 (NCH), 62.10 (NCH<sub>2</sub>N), 37.63 (NCH<sub>3</sub>). Anal. Calcd for C<sub>18</sub>H<sub>12</sub>Cu<sub>2</sub>Fe<sub>3</sub>N<sub>4</sub>O<sub>9</sub>Te: C, 25.42; H, 1.42; N, 6.59. Found: C, 25.53; H, 1.65; N, 6.67. Mp: 166 °C dec. Crystals of [TeFe<sub>3</sub>(CO)<sub>9</sub>Cu<sub>2</sub>(MeImCH<sub>2</sub>ImMe)] (**2**) suitable for X-ray diffraction were grown from hexanes/MeOH/CH<sub>2</sub>Cl<sub>2</sub>.

*Method 2.* Freshly dried THF (10 mL) was added to a mixture of MeImCH<sub>2</sub>ImMe·H<sub>2</sub>I<sub>2</sub> (0.173 g, 0.40 mmol) and KO<sup>t</sup>Bu (0.090 g, 0.80 mmol), and the mixture was stirred in an ice-water bath for 2 h. The resultant solution was filtered, and the pale yellow filtrate was then transferred to a THF solution (10 mL) of [TeFe<sub>3</sub>(CO)<sub>9</sub>Cu<sub>2</sub>(MeCN)<sub>2</sub>] (0.30 g, 0.40 mmol), which was stirred for another 30 min. The resultant solution was filtered, and the solvent was removed under vacuum. The residue was washed with deionized water and hexanes several times and then extracted with CH<sub>2</sub>Cl<sub>2</sub> to give a purplish-brown solution, which was

recrystallized with hexanes/MeOH/CH<sub>2</sub>Cl<sub>2</sub> to give [TeFe<sub>3</sub>(CO)<sub>9</sub>Cu<sub>2</sub>(MeImCH<sub>2</sub>ImMe)] (**2**) (yield 0.14 g, 0.16 mmol, 40% based on [TeFe<sub>3</sub>(CO)<sub>9</sub>Cu<sub>2</sub>(MeCN)<sub>2</sub>]).

**Synthesis of [TeFe<sub>3</sub>(CO)<sub>9</sub>Cu<sub>2</sub>(MeIm(CH<sub>2</sub>)<sub>2</sub>ImMe)] (**3**).** *Method 1.* A THF solution (20 mL) of [TeFe<sub>3</sub>(CO)<sub>9</sub>Cu<sub>2</sub>(MeCN)<sub>2</sub>] (0.33 g, 0.44 mmol), MeIm(CH<sub>2</sub>)<sub>2</sub>ImMe·H<sub>2</sub>Br<sub>2</sub> (0.16 g, 0.45 mmol), and KO<sup>t</sup>Bu (0.099 g, 0.88 mmol) was stirred at ambient temperature for 5 h. The resultant solution was filtered, and the solvent was evaporated under vacuum. The residue was extracted with Et<sub>2</sub>O to give a purplish-brown solution and evaporated under vacuum again. The solid was washed with deionized water and hexanes several times and then extracted with CH<sub>2</sub>Cl<sub>2</sub> to give a purplish-brown solution, which was recrystallized with hexanes/MeOH/CH<sub>2</sub>Cl<sub>2</sub> to give [TeFe<sub>3</sub>(CO)<sub>9</sub>Cu<sub>2</sub>(MeIm(CH<sub>2</sub>)<sub>2</sub>ImMe)] (**3**) (yield 0.079 g, 0.091 mmol, 21 % based on [TeFe<sub>3</sub>(CO)<sub>9</sub>Cu<sub>2</sub>(MeCN)<sub>2</sub>]). IR ( $\nu_{\text{CO}}$ , CH<sub>2</sub>Cl<sub>2</sub>): 2032 (m), 1985 (vs), 1967 (m), 1955 (m) cm<sup>-1</sup>. <sup>1</sup>H NMR (400 MHz, DMSO-*d*<sub>6</sub>, 300 K, ppm):  $\delta$  7.31 (s, 2H, NCH), 7.22 (s, 2H, NCH), 4.58 (s, 4H, NCH<sub>2</sub>CH<sub>2</sub>N), 3.74 (s, 6H, NCH<sub>3</sub>). <sup>13</sup>C NMR (100 MHz, DMSO-*d*<sub>6</sub>, 298 K, ppm):  $\delta$  218.44 (Fe-CO), 176.60 (C<sub>carbene</sub>), 122.34, 121.32 (NCH), 50.58 (NCH<sub>2</sub>CH<sub>2</sub>N), 37.48 (NCH<sub>3</sub>). Anal. Calcd for C<sub>19</sub>H<sub>14</sub>Cu<sub>2</sub>Fe<sub>3</sub>N<sub>4</sub>O<sub>9</sub>Te: C, 26.40; H, 1.63; N, 6.48. Found: C, 26.62; H, 1.79; N, 6.81. Mp: 171 °C dec. Crystals of [TeFe<sub>3</sub>(CO)<sub>9</sub>Cu<sub>2</sub>(MeIm(CH<sub>2</sub>)<sub>2</sub>ImMe)] (**3**) suitable for X-ray diffraction were grown from hexanes/MeOH/CH<sub>2</sub>Cl<sub>2</sub>.

*Method 2.* Freshly dried THF (15 mL) was added to a mixture of MeIm(CH<sub>2</sub>)<sub>2</sub>ImMe·H<sub>2</sub>Br<sub>2</sub>

(0.19 g, 0.54 mmol) and KO<sup>t</sup>Bu (0.12 g, 1.07 mmol), and the mixture was stirred in an ice-water bath for 3 h. The resultant solution was filtered, and the pale yellow filtrate was then transferred to a THF solution (10 mL) of [TeFe<sub>3</sub>(CO)<sub>9</sub>Cu<sub>2</sub>(MeCN)<sub>2</sub>] (0.40 g, 0.53 mmol), which was stirred for another 1.5 h. The resultant solution was filtered, and the solvent was removed under vacuum. The residue was extracted with CH<sub>2</sub>Cl<sub>2</sub> to give a purplish-brown solution and evaporated under vacuum again. The solid was washed with deionized water and hexanes several times and then extracted with THF to give a purplish-brown solution, which was recrystallized with hexanes/MeOH/THF to give [TeFe<sub>3</sub>(CO)<sub>9</sub>Cu<sub>2</sub>(MeIm(CH<sub>2</sub>)<sub>2</sub>ImMe)] (**3**) (yield 0.23 g, 0.27 mmol, 51% based on [TeFe<sub>3</sub>(CO)<sub>9</sub>Cu<sub>2</sub>(MeCN)<sub>2</sub>]).

**Synthesis of [TeFe<sub>3</sub>(CO)<sub>9</sub>Cu<sub>2</sub>(MeIm(CH<sub>2</sub>)<sub>3</sub>ImMe)] (**4**).** *Method 1.* A THF solution (20 mL) of [TeFe<sub>3</sub>(CO)<sub>9</sub>Cu<sub>2</sub>(MeCN)<sub>2</sub>] (0.35 g, 0.46 mmol), MeIm(CH<sub>2</sub>)<sub>3</sub>ImMe·H<sub>2</sub>I<sub>2</sub> (0.21 g, 0.46 mmol), and KO<sup>t</sup>Bu (0.103 g, 0.92 mmol) was stirred at ambient temperature for 9 h. The resultant solution was filtered, and the solvent was evaporated under vacuum. The residue was washed with deionized water and hexanes several times and then extracted with CH<sub>2</sub>Cl<sub>2</sub> to give a purplish-brown solution, which was recrystallized with hexanes/MeOH/CH<sub>2</sub>Cl<sub>2</sub> to give [TeFe<sub>3</sub>(CO)<sub>9</sub>Cu<sub>2</sub>(MeIm(CH<sub>2</sub>)<sub>3</sub>ImMe)] (**4**) (yield 0.043 g, 0.049 mmol, 11 % based on [TeFe<sub>3</sub>(CO)<sub>9</sub>Cu<sub>2</sub>(MeCN)<sub>2</sub>]). IR (ν<sub>CO</sub>, CH<sub>2</sub>Cl<sub>2</sub>): 2032 (m), 1984 (vs), 1968 (m), 1956 (m) cm<sup>-1</sup>. <sup>1</sup>H NMR (500 MHz, DMSO-*d*<sub>6</sub>, 300 K, ppm): δ 7.60 (br, 2H, NCH), 7.50 (br, 2H, NCH), 4.06 (s, 4H, NCH<sub>2</sub>CH<sub>2</sub>CH<sub>2</sub>N), 3.41 (br, 6H, NCH<sub>3</sub>), 2.43 (s, 2H, NCH<sub>2</sub>CH<sub>2</sub>CH<sub>2</sub>N). <sup>13</sup>C NMR

(125 MHz, DMSO-*d*<sub>6</sub>, 300 K, ppm):  $\delta$  218.94 (Fe-CO), 175.58 (*C*<sub>carbene</sub>), 123.75, 120.71 (NCH), 46.13 (NCH<sub>2</sub>CH<sub>2</sub>CH<sub>2</sub>N), 36.63 (NCH<sub>3</sub>), 29.65 (NCH<sub>2</sub>CH<sub>2</sub>CH<sub>2</sub>N). Anal. Calcd for C<sub>20</sub>H<sub>16</sub>Cu<sub>2</sub>Fe<sub>3</sub>N<sub>4</sub>O<sub>9</sub>Te: C, 27.34; H, 1.84; N, 6.38. Found: C, 27.68; H, 1.91; N, 6.38. Mp: 166 °C dec. Crystals of [TeFe<sub>3</sub>(CO)<sub>9</sub>Cu<sub>2</sub>(MeIm(CH<sub>2</sub>)<sub>3</sub>ImMe)] (**4**) suitable for X-ray diffraction were grown from hexanes/MeOH/CH<sub>2</sub>Cl<sub>2</sub>.

*Method 2.* Freshly dried THF (10 mL) was added to a mixture of MeIm(CH<sub>2</sub>)<sub>3</sub>ImMe·H<sub>2</sub>I<sub>2</sub> (0.184 g, 0.40 mmol) and KO<sup>t</sup>Bu (0.090 g, 0.80 mmol), and the mixture was stirred in an ice-water bath for 2 h. The resultant solution was filtered, and the pale yellow filtrate was then transferred to a THF solution (10 mL) of [TeFe<sub>3</sub>(CO)<sub>9</sub>Cu<sub>2</sub>(MeCN)<sub>2</sub>] (0.30 g, 0.40 mmol), which was stirred for another 30 min. The resultant solution was filtered, and the solvent was removed under vacuum. The residue was washed with deionized water and hexanes several times and then extracted with CH<sub>2</sub>Cl<sub>2</sub> to give a purplish-brown solution, which was recrystallized with hexanes/MeOH/CH<sub>2</sub>Cl<sub>2</sub> to give [TeFe<sub>3</sub>(CO)<sub>9</sub>Cu<sub>2</sub>(MeIm(CH<sub>2</sub>)<sub>3</sub>ImMe)] (**4**) (yield 0.17 g, 0.19 mmol, 48% based on [TeFe<sub>3</sub>(CO)<sub>9</sub>Cu<sub>2</sub>(MeCN)<sub>2</sub>]).

**The General Procedure for the Homocoupling of 2-, 3-, or 4-Bromophenylboronic Acids Leading to Biaryls.** A solution of catalyst **1** (0.0050 mmol) and 2-, 3-, or 4-bromophenylboronic acids (1.00 mmol) in MeOH (3 mL) was stirred at 25 °C. The resultant reaction mixture was evaporated under vacuum. The residue was purified by flash chromatography on silica gel eluted with *n*-hexane to afford biaryls. To compare the



productivities of the catalysts, all the homocoupling reactions mentioned herein were carried out repeatedly and carefully to ensure accuracy.

**The General Procedure for the Homocoupling of 3-Nitro- or 4-Methoxyphenylboronic Acids Leading to Biaryls.** A solution of catalyst **1** (0.0050 mmol) and 3-nitro- or 4-methoxyphenylboronic acids (1.00 mmol) in MeOH (3 mL) was stirred at 25 °C. The resultant reaction mixture was evaporated under vacuum. The residue was purified by flash chromatography on a silica gel column (petroleum ether/ethyl acetate, 5: 1) to afford biaryls. To compare the productivities of the catalysts, all the homocoupling reactions mentioned herein were carried out repeatedly and carefully to ensure accuracy.

**The General Procedure for the Homocoupling of 4-Nitrophenylboronic Acids Leading to Biaryls.** A solution of catalyst **1** (0.0050 mmol) and 4-nitrophenylboronic acid (1.00 mmol) in MeOH (3 mL) was stirred at 25 °C. The resultant reaction mixture was evaporated under vacuum. The residue was purified by flash chromatography on a silica gel column (petroleum ether/ethyl acetate, 5: 1) to afford 4,4'-dinitrobiphenyl (0.39 mmol, 78 %) and 4-nitrophenol (0.21 mmol, 21 %). To compare the productivities of the catalysts, the homocoupling reaction mentioned herein was carried out repeatedly and carefully to ensure accuracy.

**Optimization of  $[\text{TeFe}_3(\text{CO})_9\text{Cu}_2(\text{MeCN})_2]$ - and **1–4**-Catalyzed Homocoupling of 4-Bromophenylboronic Acid under Different Reaction Conditions.** In order to explore the behavior of  $[\text{TeFe}_3(\text{CO})_9\text{Cu}_2(\text{MeCN})_2]$  and **1–4** in catalyzing Suzuki homocoupling reactions, complex **1** was chosen as the model catalyst and 4-bromophenylboronic acid was chosen as the model substrate to optimize catalytic conditions (Table S1). We found that complex **1** (2.0 mol% of Cu loading) exhibited good catalytic performances in the homocoupling of 4-bromophenylboronic acid in MeOH at room temperature in air, without any additives such as a base or a ligand, affording the 4,4'-dibromobiphenyl product in an 84% yield (Table S1, Entry 1), which indicated that a catalytic cycle was operating under the current conditions. In the absence of catalyst **1** or under  $\text{N}_2$ , this homocoupling reaction did not occur (Entries 2-4). Moreover, when 3 mol% of Fe loading of catalyst  $[\text{Et}_4\text{N}]_2[\text{TeFe}_3(\text{CO})_9]$  was used, no biaryl products were observed, indicating that Cu was essential for the catalytic performance (Entry 5). We next examined the effect of the polar protic or aprotic solvents (Entries 6-9); however, the protic methanol was still the best choice (Entry 1). The reaction temperature had great influence on this reaction. When the temperature was increased to the refluxing MeOH temperature, the product was formed in a lower yield (27%) (Entry 10), indicating the thermal instability of catalyst **1**. Notably, when  $\text{O}_2$  was introduced into the system, the time required for the completion of the reaction reduced to 1 h and the yield maintained at a good yield (85 %) (Entry 11), suggesting that sufficient  $\text{O}_2$  was necessary. On the other hand, the

influence of the amount of complex **1** on the reaction was also examined. The results showed that a Cu loading (1.0 mol%) of catalyst **1** gave the best reaction condition with 88% yield (Entry 12), however, the lower Cu loading (0.5 mol%) required the longer reaction time (12 h) for completion of the reaction (Entry 13). Other catalysts like **2–4** and  $[\text{TeFe}_3(\text{CO})_9\text{Cu}_2(\text{MeCN})_2]$  were also used to catalyze the homocoupling of 4-bromophenylboronic acid under conditions that included 1.0 mol% of Cu loading, methanol as the solvent, room temperature, an atmosphere of  $\text{O}_2$ , and without any additives such as bases, ligands, or other oxidants (Entries 14-17).

**Electrochemical Measurements.** The electrochemical measurements were performed at room temperature under a nitrogen atmosphere and recorded using a CHI 621D electrochemical potentiostat. A glassy carbon working electrode, a platinum wire auxiliary electrode, and a non-aqueous  $\text{Ag}/\text{Ag}^+$  electrode were used in a three-electrode configuration. Tetra-*n*-butylammonium perchlorate (TBAP) was used as the supporting electrolyte, and the solute concentration was  $\sim 10^{-3}$  M. The redox potentials were calibrated with a ferrocenium/ferrocene ( $\text{Fc}^+/\text{Fc}$ ) couple in the working solution and were referenced to SCE.

To explore the effect of the incorporation of the mono- or bidentate NHC ligands into the  $\text{TeFe}_3(\text{CO})_9\text{Cu}_2$  cluster core, the electrochemical behaviors of  $[\text{TeFe}_3(\text{CO})_9\text{Cu}_2(\text{MeCN})_2]$  and **1–4** were investigated by differential pulse voltammetry (DPV). For comparison, the DPVs of  $[\text{Cu}_2(\text{MeIm}(\text{CH}_2)_2\text{ImMe})_2][\text{PF}_6]_2$  and  $[\text{Cu}(\text{MeCN})_4][\text{BF}_4]$  were performed as well.

Because of the irreversible desorption of Cu ( $-0.198$  to  $-0.489$  V),<sup>7</sup> the DPV profiles were only discussed between  $1.004$  and  $-0.20$  V. The DPV data are summarized in Table S4.

For the DPV analysis, the measurement of the peak width at the half height ( $W_{1/2}$ ) determined the electron stoichiometry.<sup>8a</sup>  $[\text{TeFe}_3(\text{CO})_9\text{Cu}_2(\text{MeCN})_2]$  and **1–4** exhibited similar redox behaviors and each showed two one-electron quasi-reversible oxidations ( $0.015 \sim 0.134$  V and  $0.232 \sim 0.286$  V) and a one-electron quasi-reversible reduction ( $-0.085 \sim -0.143$  V) (Table S4). The widths of the DPV peaks at the half-height ( $W_{1/2}$ ) of these complexes were a bit greater or lower than the value ( $W_{1/2} = 90$  mV) expected for the one-electron reversible redox couples, indicating that these DPV responses were quasi-reversible.<sup>8</sup>

**X-ray Structural Characterization of 1–4.** Selected crystallographical data for **1–4** are given in Table S5. All crystals were mounted on glass fibers with epoxy cement. Data collections for **1**, **2**, and **4** were carried out on a Bruker Apex II CCD diffractometer with graphite-monochromated Mo  $K\alpha$  radiation at 200(2) K in the  $2\theta$  range of  $2.0\text{--}50.0^\circ$ . Data collection for **3** were carried out on a Bruker-Nonius Kappa CCD diffractometer with graphite-monochromated Mo  $K\alpha$  radiation at 200(2) K employing the  $\theta\text{--}2\theta$  scan mode. An empirical absorption correction by the multi-scan method was applied to the data using SADABS.<sup>9</sup> The structures of **1–4** were solved by direct methods and refined with SHELXL-97.<sup>10</sup> Each of **3** and **4** contained two independent but chemically similar asymmetric structures in the unit cell where their bond distances and angles were similar and

only one structure was described for further comparison. For complex **4**, in order to obtain reasonable thermal parameters, the N7 and C36 atoms were restrained by using SIMU and DELU commands and the C34 and C35 atoms were restrained by using DELU command during the least-squares refinement. The non-hydrogen atoms for all structures were refined with anisotropic temperature factors. The selected distances and angles for **1–4** are listed in Table S6. These Cu—C distances are within the van der Waals interaction (2.245(5)—2.863(6) Å, **1**; 2.268(5)—2.803(5) Å, **2**; 2.307(6)—2.597(6) Å, **3**; 2.296(4)—2.787(5) Å, **4**), and the corresponding Fe—C—O angles are slightly bent from 180° (166.3(5)—174.2(6)°, **1**; 160.2(5)—179.3(4)°, **2**; 167.3(5)—174.8(6)°, **3**; 166.0(4)—173.3(4)°, **4**) (Fig. 1 and S2—S4).

## Explanation for the Checkcif Alert for 4:

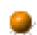

### Alert level B

**PLAT029 ALERT 3 B** \_diffrn\_measured\_fraction\_theta\_full Low ..... 0.955 Note

**Explanation:** The crystal selected for data collection was of poor quality which resulted in very weak diffraction intensity at high theta angles.

**Computational Details.** All calculations reported in the present study were performed via density functional theory (DFT) using the Gaussian 03 series of packages.<sup>11</sup> Attempts at optimization of clusters [TeFe<sub>3</sub>(CO)<sub>9</sub>Cu<sub>2</sub>(MeCN)<sub>2</sub>] and **1** led to the elongation of the Cu—Fe and Cu—Cu bonds, respectively, by more than 0.2 Å. Thus, to precisely calculate the natural charges<sup>12</sup> and Wiberg bond indices,<sup>13</sup> the single-point calculations of [TeFe<sub>3</sub>(CO)<sub>9</sub>Cu<sub>2</sub>(MeCN)<sub>2</sub>] and **1–4** with a PBE1PBE (PBE0)<sup>14</sup> hybrid functional and the large basis set Def2-TZVP<sup>15</sup> were carried out by using the Weinhold NBO method<sup>16</sup> based on their single-crystal diffraction data. Graphical representations of the molecular orbitals were obtained using GaussView 5.0 software. For orbital contributions, the molecular orbital compositions were analyzed using the AOMix program.<sup>17</sup>

## References

- (1) D. F. Shriver and M. A. Drezdon, *The Manipulation of Air-Sensitive Compounds*, Wiley-VCH Publisher, New York, 1986.
- (2) R. E. Bachman and K. H. Whitmire, *Inorg. Chem.*, 1994, **33**, 2527–2533.
- (3) G. J. Kubas, *Inorg. Synth.*, 1979, **19**, 90–92.
- (4) M. Shieh, C.-H. Ho, W.-S. Sheu, B.-G. Chen, Y.-Y. Chu, C.-Y. Miu, H.-L. Liu and C.-C. Shen, *J. Am. Chem. Soc.*, 2008, **130**, 14114–14116.
- (5) C. Tubaro, A. Biffis, R. Gava, E. Scattolin, A. Volpe, M. Basato, M. M. Díaz-Requejo and P. J. Perez, *Eur. J. Org. Chem.*, 2012, 1367–1372.
- (6) (a) W. A. Herrmann, C. Köcher, L. J. Gooßen and G. R. J. Artus, *Chem.—Eur. J.*, 1996, **2**, 1627–1636; (b) Q. Liu, F. van Rantwijk and R. A. Sheldon, *J. Chem. Technol. Biotechnol.*, 2006, **81**, 401–405; (c) F. M. Nachtigall, Y. E. Corilo, C. C. Cassol, G. Ebeling, N. H. Morgon, J. Dupont and M. N. Eberlin, *Angew. Chem., Int. Ed.*, 2008, **47**, 151–154.
- (7) (a) X. Xue, X.-S. Wang, R.-G. Xiong, X.-Z. You, B. F. Abrahams, C.-M. Che and H.-X. Ju, *Angew. Chem., Int. Ed.*, 2002, **41**, 2944–2946; (b) M. Scheer, A. Schindler, R. Merkle, B. P. Johnson, M. Linseis, R. Winter, C. E. Anson and A. V. Virovets, *J. Am. Chem. Soc.*, 2007, **129**, 13386–13387; (c) M. S. Doescher, J. M. Tour, A. M. Rawlett and M. L. Myrick, *J. Phys. Chem. B*, 2001, **105**, 105–110; (d) H. Hagenström, M. A.



- Schneeweiss and D. M. Kolb, *Langmuir*, 1999, **15**, 7802–7809.
- (8) (a) A. J. Bard and L. R. Faulkner, *Electrochemical Methods: Fundamentals and Applications*, 2nd ed., Wiley, New York, 2001, pp 291; (b) T. Nakanishi, H. Murakami, T. Sagara and N. Nakashima, *J. Phys. Chem. B*, 1999, **103**, 304.
- (9) G. M. Sheldrick, *SADABS*, Bruker AXS Inc., Madison, Wisconsin, USA, 2003.
- (10) G. M. Sheldrick, *SHELXL97*, version 97-2; University of Göttingen, Germany, 1997.
- (11) M. J. Frisch, G. W. Trucks, H. B. Schlegel, G. E. Scuseria, M. A. Robb, J. R. Cheeseman, J. A. Montgomery, Jr., T. Vreven, K. N. Kudin, J. C. Burant, J. M. Millam, S. S. Iyengar, J. Tomasi, V. Barone, B. Mennucci, M. Cossi, G. Scalmani, N. Rega, G. A. Petersson, H. Nakatsuji, M. Hada, M. Ehara, K. Toyota, R. Fukuda, J. Hasegawa, M. Ishida, T. Nakajima, Y. Honda, O. Kitao, H. Nakai, M. Klene, X. Li, J. E. Knox, H. P. Hratchian, J. B. Cross, V. Bakken, C. Adamo, J. Jaramillo, R. Gomperts, R. E. Stratmann, O. Yazyev, A. J. Austin, R. Cammi, C. Pomelli, J. W. Ochterski, P. Y. Ayala, K. Morokuma, G. A. Voth, P. Salvador, J. J. Dannenberg, V. G. Zakrzewski, S. Dapprich, A. D. Daniels, M. C. Strain, O. Farkas, D. K. Malick, A. D. Rabuck, K. Raghavachari, J. B. Foresman, J. V. Ortiz, Q. Cui, A. G. Baboul, S. Clifford, J. Cioslowski, B. B. Stefanov, G. Liu, A. Liashenko, P. Piskorz, I. Komaromi, R. L. Martin, D. J. Fox, T. Keith, M. A. Al-Laham, C. Y. Peng, A. Nanayakkara, M. Challacombe, P. M. W. Gill, B. Johnson, W. Chen, M. W. Wong, C. Gonzalez and J. A.

- Pople, GAUSSIAN 03 (Revision E.01), Gaussian, Inc., Wallingford, CT, 2004.
- (12) (a) A. E. Reed and F. Weinhold, *J. Chem. Phys.*, 1983, **78**, 4066–4073; (b) A. E. Reed, R. B. Weinstock and F. Weinhold, *J. Chem. Phys.*, 1985, **83**, 735–746.
- (13) K. B. Wiberg, *Tetrahedron*, 1968, **24**, 1083–1096.
- (14) C. Adamo and V. Barone, *J. Chem. Phys.*, 1999, **110**, 6158–6170.
- (15) F. Weigend and R. Ahlrichs, *Phys. Chem. Chem. Phys.*, 2005, **7**, 3297–3305.
- (16) A. E. Reed, L. A. Curtiss and F. Weinhold, *Chem. Rev.*, 1988, **88**, 899–926.
- (17) S. I. Gorelsky, AOMIX program, <http://www.sg-chem.net/>.
- (18) R. B. N. Baig and R. S. Varma, *Green Chem.*, 2013, **15**, 398–417.
- (19) A. S. Demir, Ö. Reis and M. Emrullahoglu, *J. Org. Chem.*, 2003, **68**, 10130–10134.
- (20) R. Luque, B. Baruwati and R. S. Varma, *Green Chem.*, 2010, **12**, 1540–1543.
- (21) N. Hussain, P. Gogoi, V. K. Azhaganand, M. V. Shelke and M. R. Das, *Catal. Sci. Technol.*, 2015, **5**, 1251–1260.
- (22) C. González-Arellano, A. Corma, M. Iglesias and F. Sánchez, *Chem. Commun.*, 2005, 1990–1992.
- (23) X. Zhang, H. Zhao and J. Wang, *J. Nanosci. Nanotechnol.*, 2010, **10**, 5153–5160.
- (24) A. Prastaro, P. Ceci, E. Chiancone, A. Boffi, G. Fabrizi and S. Cacchi, *Tetrahedron Lett.*, 2010, **51**, 2550–2552.
- (25) M. S. Wong and X. L. Zhang, *Tetrahedron Lett.*, 2001, **42**, 4087–4089.

- (26) G. W. Kabalka and L. Wang, *Tetrahedron Lett.*, 2002, **43**, 3067–3068.
- (27) A. L., II. Miller and N. B. Bowden, *J. Org. Chem.*, 2009, **74**, 4834–4840.
- (28) P. Puthiaraj, P. Suresh and K. Pitchumani, *Green Chem.*, 2014, **16**, 2865–2875.
- (29) N. Kirai and Y. Yamamoto, *Eur. J. Org. Chem.*, 2009, 1864–1867.
- (30) A. R. Kapdi, G. Dhangar, J. L. Serrano, J. A. De Haro, P. Lozano and I. J. S. Fairlamb, *RSC Adv.*, 2014, **4**, 55305–55312
- (31) G. Cheng and M. Luo, *Eur. J. Org. Chem.*, 2011, 2519–2523.

**Table S1** [TeFe<sub>3</sub>(CO)<sub>9</sub>Cu<sub>2</sub>(MeCN)<sub>2</sub>]- and **1-4**-catalyzed homocoupling of 4-bromophenylboronic acid: the optimization of the reaction conditions.<sup>a</sup>

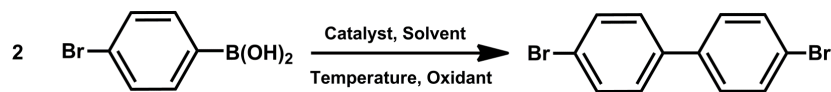

| Entry | Catalyst                                                                                                      | Solvent       | Cu<br>(mol%)   | Temp.<br>(°C) | Time<br>(h) | Oxidant                     | Yield<br>(%) <sup>b,c</sup> |
|-------|---------------------------------------------------------------------------------------------------------------|---------------|----------------|---------------|-------------|-----------------------------|-----------------------------|
| 1     | [TeFe <sub>3</sub> (CO) <sub>9</sub> Cu <sub>2</sub> (Me <sub>2</sub> Im) <sub>2</sub> ] ( <b>1</b> )         | MeOH          | 2.0            | 25            | 2           | Air                         | 84                          |
| 2     | –                                                                                                             | MeOH          | 0              | 25            | 20          | Air                         | 0                           |
| 3     | –                                                                                                             | MeOH          | 0              | 25            | 20          | O <sub>2</sub> <sup>e</sup> | 0                           |
| 4     | [TeFe <sub>3</sub> (CO) <sub>9</sub> Cu <sub>2</sub> (Me <sub>2</sub> Im) <sub>2</sub> ] ( <b>1</b> )         | MeOH          | 2.0            | 25            | 8           | — <sup>f</sup>              | 0                           |
| 5     | [Et <sub>4</sub> N] <sub>2</sub> [TeFe <sub>3</sub> (CO) <sub>9</sub> ]                                       | MeOH          | 0 <sup>d</sup> | 25            | 12          | O <sub>2</sub> <sup>e</sup> | 0                           |
| 6     | [TeFe <sub>3</sub> (CO) <sub>9</sub> Cu <sub>2</sub> (Me <sub>2</sub> Im) <sub>2</sub> ] ( <b>1</b> )         | EtOH          | 2.0            | 25            | 24          | Air                         | 26                          |
| 7     | [TeFe <sub>3</sub> (CO) <sub>9</sub> Cu <sub>2</sub> (Me <sub>2</sub> Im) <sub>2</sub> ] ( <b>1</b> )         | <i>i</i> PrOH | 2.0            | 25            | 24          | Air                         | Trace <sup>g</sup>          |
| 8     | [TeFe <sub>3</sub> (CO) <sub>9</sub> Cu <sub>2</sub> (Me <sub>2</sub> Im) <sub>2</sub> ] ( <b>1</b> )         | THF           | 2.0            | 25            | 24          | Air                         | Trace <sup>g</sup>          |
| 9     | [TeFe <sub>3</sub> (CO) <sub>9</sub> Cu <sub>2</sub> (Me <sub>2</sub> Im) <sub>2</sub> ] ( <b>1</b> )         | DMF           | 2.0            | 25            | 24          | Air                         | 60                          |
| 10    | [TeFe <sub>3</sub> (CO) <sub>9</sub> Cu <sub>2</sub> (Me <sub>2</sub> Im) <sub>2</sub> ] ( <b>1</b> )         | MeOH          | 2.0            | 64            | 8           | Air                         | 27                          |
| 11    | [TeFe <sub>3</sub> (CO) <sub>9</sub> Cu <sub>2</sub> (Me <sub>2</sub> Im) <sub>2</sub> ] ( <b>1</b> )         | MeOH          | 2.0            | 25            | 1           | O <sub>2</sub> <sup>e</sup> | 85                          |
| 12    | [TeFe <sub>3</sub> (CO) <sub>9</sub> Cu <sub>2</sub> (Me <sub>2</sub> Im) <sub>2</sub> ] ( <b>1</b> )         | MeOH          | 1.0            | 25            | 2           | O <sub>2</sub> <sup>e</sup> | 88                          |
| 13    | [TeFe <sub>3</sub> (CO) <sub>9</sub> Cu <sub>2</sub> (Me <sub>2</sub> Im) <sub>2</sub> ] ( <b>1</b> )         | MeOH          | 0.5            | 25            | 12          | O <sub>2</sub> <sup>e</sup> | 82                          |
| 14    | [TeFe <sub>3</sub> (CO) <sub>9</sub> Cu <sub>2</sub> (MeImCH <sub>2</sub> ImMe)] ( <b>2</b> )                 | MeOH          | 1.0            | 25            | 2           | O <sub>2</sub> <sup>e</sup> | 87                          |
| 15    | [TeFe <sub>3</sub> (CO) <sub>9</sub> Cu <sub>2</sub> (MeIm(CH <sub>2</sub> ) <sub>2</sub> ImMe)] ( <b>3</b> ) | MeOH          | 1.0            | 25            | 2           | O <sub>2</sub> <sup>e</sup> | 88                          |
| 16    | [TeFe <sub>3</sub> (CO) <sub>9</sub> Cu <sub>2</sub> (MeIm(CH <sub>2</sub> ) <sub>3</sub> ImMe)] ( <b>4</b> ) | MeOH          | 1.0            | 25            | 2           | O <sub>2</sub> <sup>e</sup> | 88                          |
| 17    | [TeFe <sub>3</sub> (CO) <sub>9</sub> Cu <sub>2</sub> (MeCN) <sub>2</sub> ]                                    | MeOH          | 1.0            | 25            | 3           | O <sub>2</sub> <sup>e</sup> | 85                          |
| 18    | [TeFe <sub>3</sub> (CO) <sub>9</sub> Cu <sub>2</sub> (MeCN) <sub>2</sub> ]                                    | MeOH          | 0.5            | 25            | 17          | O <sub>2</sub> <sup>e</sup> | 78                          |

<sup>a</sup> Reaction conditions: 4-bromophenylboronic acid (1.0 mmol), solvent (3.0 mL). <sup>b</sup> Isolated yield as an average of three runs. <sup>c</sup> All reactions were monitored by TLC. <sup>d</sup> 3.0 mol% of Fe loading. <sup>e</sup> O<sub>2</sub> (1 atm, balloon). <sup>f</sup> N<sub>2</sub> atmosphere. <sup>g</sup> Detected by <sup>1</sup>H NMR.

**Table S2** The reported catalytic systems for homocoupling of 4-bromophenylboronic acid, in which higher temperature (Entries 1-8), additional base (Entries 1, 3, 5, 6, and 8-10), external additives (Entries 7-10), longer reaction time (Entries 5-14), and higher loading of the catalyst (Entries 2 and 8-14) are required compared to our system.

| Entry | Catalyst                                                                              | Additive                           | Base                                    | Solvent                                     | Oxidant        | Temp. (°C)                      | Time (h) | Yield (%) | Reference |
|-------|---------------------------------------------------------------------------------------|------------------------------------|-----------------------------------------|---------------------------------------------|----------------|---------------------------------|----------|-----------|-----------|
| 1     | Nano-FGT <sup>a</sup>                                                                 | —                                  | 0.1 N NaOH                              | H <sub>2</sub> O                            | —              | 120-130 (Microwave irradiation) | 0.75-1   | > 99      | 18        |
| 2     | Cu(OAc) <sub>2</sub> (50.0 mol%)                                                      | —                                  | —                                       | DMF                                         | O <sub>2</sub> | 100                             | 1        | 93        | 19        |
| 3     | Nano-ferrite glutathione                                                              | —                                  | 0.1 M NaOH                              | H <sub>2</sub> O                            | —              | 120-130 (Microwave irradiation) | 0.75     | > 99      | 20        |
| 4     | CuNP-rGO (25 mg mL <sup>-1</sup> )                                                    | —                                  | —                                       | DMF                                         | —              | Microwave irradiation (360 W)   | 0.25     | 92        | 21        |
| 5     | Au-(MCM-41)                                                                           | —                                  | K <sub>2</sub> CO <sub>3</sub> (2 eq.)  | Xylene                                      | —              | 130                             | 24       | 95        | 22        |
| 6     | Au(I) PS- <i>co</i> -PMAA                                                             | —                                  | Cs <sub>2</sub> CO <sub>3</sub>         | 1-methyl-pyrrolidin-2-one /H <sub>2</sub> O | —              | 110                             | 43       | 99        | 23        |
| 7     | Pd <sub>np</sub> /Te-Dps (0.05 mol%)                                                  | 1 M Tris-HCl Buffer at PH 8.9      | —                                       | H <sub>2</sub> O                            | Air            | 100                             | 24       | 78        | 24        |
| 8     | Pd(OAc) <sub>2</sub> (5.0 mol%)                                                       | PPh <sub>3</sub>                   | K <sub>2</sub> CO <sub>3</sub> (2 eq.)  | DMF                                         | Air            | 90                              | 4        | 12        | 25        |
| 9     | PdCl <sub>2</sub> (3.0 mol%)                                                          | <i>p</i> -Toluenesulfonyl chloride | Na <sub>2</sub> CO <sub>3</sub> (2 eq.) | EtOH/H <sub>2</sub> O                       | — <sup>b</sup> | r.t.                            | 12       | 96        | 26        |
| 10    | PdCl <sub>2</sub> (3.0 mol%)                                                          | <i>p</i> -Toluenesulfonyl chloride | Na <sub>2</sub> CO <sub>3</sub> (2 eq.) | EtOH/H <sub>2</sub> O                       | Air            | —                               | 12       | 93        | 27        |
| 11    | Cu(BDC) MOF (19.4 mol%)                                                               | —                                  | —                                       | DMF                                         | Air            | r.t.                            | 16       | 93        | 28        |
| 12    | [{(phen)Cu( $\mu$ -OH)} <sub>2</sub> Cl <sub>2</sub> ] • 3H <sub>2</sub> O (2.0 mol%) | —                                  | —                                       | IPA                                         | Air            | 28                              | 12       | 92        | 29        |
| 13    | [Pd(Phbz)(OAc)(PPh <sub>3</sub> )] (5.0 mol%)                                         | —                                  | —                                       | THF                                         | Air            | 20                              | 24       | 82        | 30        |
| 14    | CuCl (2.0 mol%)                                                                       | —                                  | —                                       | MeOH                                        | Air            | 25                              | 4        | 74        | 31        |

<sup>a</sup> Glutathione-functionalized nano-Fe<sub>3</sub>O<sub>4</sub>. <sup>b</sup> Under N<sub>2</sub>.

**Table S3** Results of natural bond order of [TeFe<sub>3</sub>(CO)<sub>9</sub>Cu<sub>2</sub>(MeCN)<sub>2</sub>] and **1–4** at the level of PBE0/Def2-TZVP.

| Complex                                                                    | Wiberg bond index |       |       |                   |       |       |
|----------------------------------------------------------------------------|-------------------|-------|-------|-------------------|-------|-------|
|                                                                            | Te–Fe             | Fe–Fe | Cu–Fe | Cu–X <sup>a</sup> | Cu–Cu | Te–Cu |
| [TeFe <sub>3</sub> (CO) <sub>9</sub> Cu <sub>2</sub> (MeCN) <sub>2</sub> ] | 0.616             | 0.160 | 0.079 | 0.200             | 0.028 |       |
| <b>1</b>                                                                   | 0.625             | 0.157 | 0.065 | 0.363             | 0.035 | 0.174 |
| <b>2</b>                                                                   | 0.628             | 0.161 | 0.078 | 0.336             | 0.030 |       |
| <b>3</b>                                                                   | 0.626             | 0.158 | 0.066 | 0.366             | 0.034 | 0.208 |
| <b>4</b>                                                                   | 0.626             | 0.159 | 0.068 | 0.354             | 0.029 | 0.182 |

<sup>a</sup> X = N or C atom.

**Table S4** Differential pulse voltammetry of [TeFe<sub>3</sub>(CO)<sub>9</sub>Cu<sub>2</sub>(MeCN)<sub>2</sub>] and **1–4**.

| Complex                                                                                                   | Oxidation process                            |                                             | Reduction process                            |                                             |
|-----------------------------------------------------------------------------------------------------------|----------------------------------------------|---------------------------------------------|----------------------------------------------|---------------------------------------------|
|                                                                                                           | $E_p^{\text{red}}/V^a$<br>( $W_{1/2}/mV^c$ ) | $E_p^{\text{ox}}/V^b$<br>( $W_{1/2}/mV^c$ ) | $E_p^{\text{red}}/V^a$<br>( $W_{1/2}/mV^c$ ) | $E_p^{\text{ox}}/V^b$<br>( $W_{1/2}/mV^c$ ) |
| [TeFe <sub>3</sub> (CO) <sub>9</sub> Cu <sub>2</sub> (MeCN) <sub>2</sub> ]                                | 0.054 (109)                                  | — <sup>d</sup> (br)                         | -0.124 (105)                                 | — <sup>d</sup> (br)                         |
|                                                                                                           | 0.232 (118)                                  | 0.220 (95)                                  | -0.464 (84)                                  | -0.198 (98) <sup>e</sup>                    |
| <b>1</b>                                                                                                  | 0.015 (113)                                  | — <sup>d</sup> (br)                         | -0.085 (113)                                 | — <sup>d</sup> (br)                         |
|                                                                                                           | 0.277 (117)                                  | 0.263 (111)                                 | -0.449 (97)                                  | -0.337 (134) <sup>e</sup>                   |
| <b>2</b>                                                                                                  | 0.134 (108)                                  | — <sup>d</sup> (br)                         | -0.130 (105)                                 | -0.174 (83)                                 |
|                                                                                                           | 0.286 (101)                                  | 0.274 (119)                                 | -0.430 (111)                                 | -0.398 (72) <sup>e</sup>                    |
| <b>3</b>                                                                                                  | 0.097 (111)                                  | 0.083 (89)                                  | -0.143 (99)                                  | -0.193 (120)                                |
|                                                                                                           | 0.265 (82)                                   | 0.255 (82)                                  | -0.475 (115)                                 | -0.489 (170) <sup>e</sup>                   |
| <b>4</b>                                                                                                  | 0.060 (101)                                  | — <sup>d</sup> (br)                         | -0.140 (103)                                 | -0.148 (96)                                 |
|                                                                                                           | 0.242 (97)                                   | 0.232 (85)                                  | -0.496 (104)                                 | -0.380 (124) <sup>e</sup>                   |
| [Cu <sub>2</sub> (MeIm(CH <sub>2</sub> ) <sub>2</sub> ImMe) <sub>2</sub> ][PF <sub>6</sub> ] <sub>2</sub> | 0.399 (125)                                  | 0.363 (br)                                  | -0.529 (50)                                  |                                             |
|                                                                                                           | 0.517 (128)                                  | — <sup>d</sup> (br)                         |                                              | -0.317 (166) <sup>e</sup>                   |
| [Cu(MeCN) <sub>4</sub> ][BF <sub>4</sub> ]                                                                | 1.004 (119)                                  | 1.016 (132)                                 | -0.600 (48)                                  |                                             |
|                                                                                                           |                                              |                                             |                                              | -0.280 (106) <sup>e</sup>                   |

<sup>a</sup>  $E_p^{\text{red}}$  = reductive peak potential. <sup>b</sup>  $E_p^{\text{ox}}$  = oxidative peak potential. <sup>c</sup>  $W_{1/2}$  = width at half-height. <sup>d</sup> Difficult to determine due to the Cu desorption. <sup>e</sup> The Cu desorption peak.

**Table S5** Crystallographic data for [TeFe<sub>3</sub>(CO)<sub>9</sub>Cu<sub>2</sub>(Me<sub>2</sub>Im)<sub>2</sub>] (1), [TeFe<sub>3</sub>(CO)<sub>9</sub>Cu<sub>2</sub>(MeImCH<sub>2</sub>ImMe)] (2), [TeFe<sub>3</sub>(CO)<sub>9</sub>Cu<sub>2</sub>(MeIm(CH<sub>2</sub>)<sub>2</sub>ImMe)] (3), and [TeFe<sub>3</sub>(CO)<sub>9</sub>Cu<sub>2</sub>(MeIm(CH<sub>2</sub>)<sub>3</sub>ImMe)] (4).

|                                                                                                                | 1                                                                                                | 2                                                                                                | 3                                                                                                | 4                                                                                                |
|----------------------------------------------------------------------------------------------------------------|--------------------------------------------------------------------------------------------------|--------------------------------------------------------------------------------------------------|--------------------------------------------------------------------------------------------------|--------------------------------------------------------------------------------------------------|
| Empirical formula                                                                                              | C <sub>19</sub> H <sub>16</sub> Cu <sub>2</sub> Fe <sub>3</sub> N <sub>4</sub> O <sub>9</sub> Te | C <sub>18</sub> H <sub>12</sub> Cu <sub>2</sub> Fe <sub>3</sub> N <sub>4</sub> O <sub>9</sub> Te | C <sub>19</sub> H <sub>14</sub> Cu <sub>2</sub> Fe <sub>3</sub> N <sub>4</sub> O <sub>9</sub> Te | C <sub>20</sub> H <sub>16</sub> Cu <sub>2</sub> Fe <sub>3</sub> N <sub>4</sub> O <sub>9</sub> Te |
| Fw                                                                                                             | 866.59                                                                                           | 850.55                                                                                           | 864.57                                                                                           | 878.60                                                                                           |
| Crystal system                                                                                                 | Monoclinic                                                                                       | Orthorhombic                                                                                     | Triclinic                                                                                        | Triclinic                                                                                        |
| Space group                                                                                                    | <i>C2/c</i>                                                                                      | <i>Pnma</i>                                                                                      | <i>P</i> $\bar{1}$                                                                               | <i>P</i> $\bar{1}$                                                                               |
| Crystal dimens, mm                                                                                             | 0.44 x 0.32 x 0.20                                                                               | 0.38 x 0.21 x 0.10                                                                               | 0.27 x 0.17 x 0.03                                                                               | 0.38 x 0.24 x 0.12                                                                               |
| <i>a</i> , Å                                                                                                   | 32.1115(6)                                                                                       | 16.6462(5)                                                                                       | 9.9886(1)                                                                                        | 10.1041(4)                                                                                       |
| <i>b</i> , Å                                                                                                   | 8.6471(2)                                                                                        | 16.1627(5)                                                                                       | 13.5547(2)                                                                                       | 13.6572(5)                                                                                       |
| <i>c</i> , Å                                                                                                   | 21.3640(5)                                                                                       | 9.3673(3)                                                                                        | 20.5089(3)                                                                                       | 20.2351(8)                                                                                       |
| $\alpha$ , deg                                                                                                 |                                                                                                  |                                                                                                  | 75.7093(7)                                                                                       | 76.356(2)                                                                                        |
| $\beta$ , deg                                                                                                  | 116.247(1)                                                                                       |                                                                                                  | 81.2285(6)                                                                                       | 82.953(2)                                                                                        |
| $\gamma$ , deg                                                                                                 |                                                                                                  |                                                                                                  | 77.5563(7)                                                                                       | 79.062(2)                                                                                        |
| <i>V</i> , Å <sup>3</sup>                                                                                      | 5320.5(2)                                                                                        | 2520.3(1)                                                                                        | 2613.10(6)                                                                                       | 2655.3(2)                                                                                        |
| <i>Z</i>                                                                                                       | 8                                                                                                | 4                                                                                                | 4                                                                                                | 4                                                                                                |
| <i>D</i> (calcd), g cm <sup>-3</sup>                                                                           | 2.164                                                                                            | 2.242                                                                                            | 2.198                                                                                            | 2.198                                                                                            |
| $\mu$ , mm <sup>-1</sup>                                                                                       | 4.299                                                                                            | 4.535                                                                                            | 4.376                                                                                            | 4.308                                                                                            |
| Color, habit                                                                                                   | black, prism                                                                                     | black, prism                                                                                     | black, prism                                                                                     | black, prism                                                                                     |
| Diffractometer                                                                                                 | Apex II CCD                                                                                      | Apex II CCD                                                                                      | Nonius (Kappa CCD)                                                                               | Apex II CCD                                                                                      |
| Radiation ( $\lambda$ ), Å                                                                                     | 0.71073                                                                                          | 0.71073                                                                                          | 0.71073                                                                                          | 0.71073                                                                                          |
| Temperature, K                                                                                                 | 200(2)                                                                                           | 200(2)                                                                                           | 200(2)                                                                                           | 200(2)                                                                                           |
| $\theta$ range for data collection, deg                                                                        | 1.96–25.02                                                                                       | 2.45–25.02                                                                                       | 2.06–25.02                                                                                       | 1.56–25.07                                                                                       |
| <i>T</i> <sub>min</sub> / <i>T</i> <sub>max</sub>                                                              | 0.25/0.48                                                                                        | 0.28/0.66                                                                                        | 0.42/0.64                                                                                        | 0.29/0.63                                                                                        |
| No. of indep. reflns ( <i>I</i> > 2 $\sigma$ ( <i>I</i> ))                                                     | 4123 ( <i>R</i> <sub>int</sub> = 0.027)                                                          | 1998 ( <i>R</i> <sub>int</sub> = 0.026)                                                          | 7628 ( <i>R</i> <sub>int</sub> = 0.054)                                                          | 7888 ( <i>R</i> <sub>int</sub> = 0.024)                                                          |
| No. of parameters                                                                                              | 337                                                                                              | 175                                                                                              | 685                                                                                              | 703                                                                                              |
| Goodness of fit                                                                                                | 1.192                                                                                            | 1.333                                                                                            | 1.094                                                                                            | 1.042                                                                                            |
| <i>R</i> <sub>1</sub> <sup>a</sup> / <i>wR</i> <sub>2</sub> <sup>a</sup> ( <i>I</i> > 2 $\sigma$ ( <i>I</i> )) | 0.032/0.096                                                                                      | 0.020/0.066                                                                                      | 0.035/0.098                                                                                      | 0.030/0.074                                                                                      |
| <i>R</i> <sub>1</sub> <sup>a</sup> / <i>wR</i> <sub>2</sub> <sup>a</sup> (all data)                            | 0.042/0.117                                                                                      | 0.034/0.101                                                                                      | 0.051/0.116                                                                                      | 0.036/0.077                                                                                      |

<sup>a</sup> The functions minimized during least-squares cycles were  $R_1 = \Sigma||F_o| - |F_c|| / \Sigma|F_o|$  and  $wR_2 = \{\Sigma[w(F_o^2 - F_c^2)^2] / \Sigma[w(F_o^2)^2]\}^{1/2}$ .



**Table S6** Selected bond distances (Å) and bond angles (deg) for [TeFe<sub>3</sub>(CO)<sub>9</sub>Cu<sub>2</sub>(Me<sub>2</sub>Im)<sub>2</sub>] (1), [TeFe<sub>3</sub>(CO)<sub>9</sub>Cu<sub>2</sub>(MeImCH<sub>2</sub>ImMe)] (2), [TeFe<sub>3</sub>(CO)<sub>9</sub>Cu<sub>2</sub>(MeIm(CH<sub>2</sub>)<sub>2</sub>ImMe)] (3), and [TeFe<sub>3</sub>(CO)<sub>9</sub>Cu<sub>2</sub>(MeIm(CH<sub>2</sub>)<sub>3</sub>ImMe)] (4).

| <b>1</b>          |           |                   |           |
|-------------------|-----------|-------------------|-----------|
| Te(1)—Fe(1)       | 2.5073(8) | Fe(2)—Cu(1)       | 2.5418(8) |
| Te(1)—Fe(2)       | 2.5118(8) | Fe(2)—Cu(2)       | 2.6348(9) |
| Te(1)—Fe(3)       | 2.4984(8) | Fe(1)—Fe(2)       | 2.7492(9) |
| Te(1)—Cu(2)       | 2.7818(7) | Fe(1)—Fe(3)       | 2.6409(9) |
| Cu(1)—Cu(2)       | 2.5949(9) | Fe(2)—Fe(3)       | 2.6498(9) |
| Fe(1)—Cu(1)       | 2.5434(8) | Cu(2)—C(15)       | 1.936(5)  |
| Fe(1)—Cu(2)       | 2.5004(9) | Cu(1)—C(10)       | 1.929(5)  |
| Te(1)—Fe(1)—Fe(2) | 56.87(2)  | Fe(1)—Fe(2)—Fe(3) | 58.54(2)  |
| Te(1)—Fe(1)—Fe(3) | 57.99(2)  | Fe(1)—Fe(3)—Fe(2) | 62.61(2)  |
| Te(1)—Fe(2)—Fe(1) | 56.71(2)  | Fe(2)—Fe(1)—Fe(3) | 58.85(2)  |
| Te(1)—Fe(2)—Fe(3) | 57.82(2)  | Fe(1)—Cu(1)—Cu(2) | 58.23(2)  |
| Te(1)—Cu(2)—Cu(1) | 100.67(2) | Fe(1)—Cu(2)—Cu(1) | 59.86(2)  |
| Te(1)—Fe(3)—Fe(1) | 58.32(2)  | Fe(2)—Cu(1)—Cu(2) | 61.71(2)  |
| Te(1)—Fe(3)—Fe(2) | 58.32(2)  | Fe(2)—Cu(2)—Cu(1) | 58.15(2)  |
| Te(1)—Fe(1)—Cu(1) | 110.13(3) | Fe(1)—Cu(1)—Fe(2) | 65.45(3)  |
| Te(1)—Fe(2)—Cu(1) | 110.04(3) | Fe(1)—Cu(2)—Fe(2) | 64.68(3)  |
| Te(1)—Fe(1)—Cu(2) | 67.49(2)  | Cu(1)—Fe(1)—Cu(2) | 61.92(3)  |
| Te(1)—Fe(2)—Cu(2) | 65.39(2)  | Cu(1)—Fe(2)—Cu(2) | 60.14(2)  |
| Te(1)—Cu(2)—Fe(1) | 56.37(2)  | Fe(3)—Fe(1)—Cu(1) | 103.17(3) |
| Te(1)—Cu(2)—Fe(2) | 55.18(2)  | Fe(2)—Fe(1)—Cu(1) | 57.25(2)  |
| Fe(2)—Cu(1)—Cu(2) | 58.15(2)  | Fe(3)—Fe(2)—Cu(1) | 102.96(3) |
| Fe(1)—Te(1)—Cu(2) | 56.14(2)  | Fe(3)—Fe(2)—Cu(2) | 108.47(3) |
| Fe(2)—Te(1)—Cu(2) | 59.44(2)  | Fe(1)—Fe(2)—Cu(2) | 55.30(2)  |
| Fe(3)—Te(1)—Cu(2) | 108.48(2) | Fe(1)—Fe(2)—Cu(1) | 57.30(2)  |
| Fe(1)—Te(1)—Fe(2) | 66.43(2)  | Fe(2)—Fe(1)—Cu(2) | 60.03(3)  |
| Fe(1)—Te(1)—Fe(3) | 63.69(2)  | Fe(3)—Fe(1)—Cu(2) | 113.00(3) |
| Fe(2)—Te(1)—Fe(3) | 63.86(2)  |                   |           |
| <b>2</b>          |           |                   |           |
| Te(1)—Fe(1)       | 2.4651(6) | Te(1)—Fe(2)       | 2.4762(7) |
| Fe(1)—Cu(1)       | 2.4660(7) | Fe(2)—Cu(1)       | 2.5292(8) |
| Fe(1)—Fe(1a)      | 2.668(1)  | Cu(1)—Cu(1a)      | 2.548(1)  |
| Fe(1)—Fe(2)       | 2.7391(8) | Cu(1)—C(9)        | 1.939(4)  |

|                    |           |                     |           |
|--------------------|-----------|---------------------|-----------|
| Te(1)—Fe(1)—Cu(1)  | 114.31(2) | Cu(1a)—Fe(2)—Fe(1)  | 85.77(3)  |
| Te(1)—Fe(1)—Fe(1a) | 57.24(1)  | Te(1)—Fe(2)—Fe(1a)  | 56.14(2)  |
| Cu(1)—Fe(1)—Fe(1a) | 88.62(2)  | Cu(1)—Fe(2)—Fe(1a)  | 85.77(3)  |
| Te(1)—Fe(1)—Fe(2)  | 56.53(2)  | Cu(1a)—Fe(2)—Fe(1a) | 55.65(2)  |
| Cu(1)—Fe(1)—Fe(2)  | 57.86(2)  | Fe(1)—Fe(2)—Fe(1a)  | 58.28(3)  |
| Fe(1a)—Fe(1)—Fe(2) | 60.86(1)  | Fe(1)—Cu(1)—Fe(2)   | 66.49(2)  |
| Te(1)—Fe(2)—Cu(1)  | 111.71(3) | Fe(1)—Cu(1)—Cu(1a)  | 91.39(2)  |
| Te(1)—Fe(2)—Cu(1a) | 111.71(3) | Fe(2)—Cu(1)—Cu(1a)  | 59.75(1)  |
| Cu(1)—Fe(2)—Cu(1a) | 60.50(3)  | Fe(1)—Te(1)—Fe(1a)  | 65.51(3)  |
| Te(1)—Fe(2)—Fe(1)  | 56.14(2)  | Fe(1)—Te(1)—Fe(2)   | 67.33(2)  |
| Cu(1)—Fe(2)—Fe(1)  | 55.65(2)  | Fe(1a)—Te(1)—Fe(2)  | 67.33(2)  |
| 3                  |           |                     |           |
| Te(1)—Fe(1)        | 2.4853(9) | Fe(3)—Cu(2)         | 2.521(1)  |
| Te(1)—Fe(3)        | 2.5124(8) | Fe(2)—Cu(2)         | 2.588(1)  |
| Te(1)—Fe(2)        | 2.5263(8) | Fe(1)—Fe(2)         | 2.644(1)  |
| Te(1)—Cu(1)        | 2.6755(8) | Fe(1)—Fe(3)         | 2.660(1)  |
| Fe(3)—Cu(1)        | 2.537(1)  | Fe(2)—Fe(3)         | 2.751(1)  |
| Fe(2)—Cu(1)        | 2.571(1)  | Cu(1)—C(19)         | 1.928(5)  |
| Cu(1)—Cu(2)        | 2.620(1)  | Cu(2)—C(28)         | 1.939(6)  |
| Fe(1)—Te(1)—Fe(3)  | 64.31(3)  | Te(1)—Fe(1)—Fe(3)   | 58.34(2)  |
| Fe(1)—Te(1)—Fe(2)  | 63.67(3)  | Fe(2)—Fe(1)—Fe(3)   | 62.49(3)  |
| Fe(3)—Te(1)—Fe(2)  | 66.19(3)  | Te(1)—Fe(2)—Cu(1)   | 63.31(2)  |
| Fe(1)—Te(1)—Cu(1)  | 110.25(3) | Te(1)—Fe(2)—Cu(2)   | 108.19(3) |
| Fe(3)—Te(1)—Cu(1)  | 58.45(2)  | Cu(1)—Fe(2)—Cu(2)   | 61.03(3)  |
| Fe(2)—Te(1)—Cu(1)  | 59.16(2)  | Te(1)—Fe(2)—Fe(1)   | 57.41(3)  |
| Fe(3)—Cu(1)—Fe(2)  | 65.18(3)  | Cu(1)—Fe(2)—Fe(1)   | 108.61(3) |
| Fe(3)—Cu(1)—Cu(2)  | 58.50(3)  | Cu(2)—Fe(2)—Fe(1)   | 104.21(4) |
| Fe(2)—Cu(1)—Cu(2)  | 59.81(3)  | Te(1)—Fe(2)—Fe(3)   | 56.67(2)  |
| Fe(3)—Cu(1)—Te(1)  | 57.56(2)  | Cu(1)—Fe(2)—Fe(3)   | 56.81(3)  |
| Fe(2)—Cu(1)—Te(1)  | 57.53(2)  | Cu(2)—Fe(2)—Fe(3)   | 56.24(3)  |
| Cu(2)—Cu(1)—Te(1)  | 102.95(3) | Fe(1)—Fe(2)—Fe(3)   | 59.04(3)  |
| Fe(3)—Cu(2)—Fe(2)  | 65.15(3)  | Te(1)—Fe(3)—Cu(2)   | 110.79(3) |
| Fe(3)—Cu(2)—Cu(1)  | 59.10(3)  | Te(1)—Fe(3)—Cu(1)   | 63.99(3)  |
| Fe(2)—Cu(2)—Cu(1)  | 59.16(3)  | Fe(1)—Fe(3)—Fe(2)   | 58.46(3)  |
| Te(1)—Fe(1)—Fe(2)  | 58.92(2)  | Te(1)—Fe(3)—Fe(1)   | 57.35(3)  |
| Te(1)—Fe(3)—Fe(2)  | 57.15(2)  | Cu(1)—Fe(3)—Fe(1)   | 109.15(4) |
| Cu(1)—Fe(3)—Fe(2)  | 58.01(3)  | Cu(2)—Fe(3)—Fe(2)   | 58.61(3)  |

---

Cu(2)—Fe(3)—Fe(1) 105.65(4)

4

|             |           |             |           |
|-------------|-----------|-------------|-----------|
| Te(1)—Fe(1) | 2.5151(6) | Fe(3)—Cu(2) | 2.5325(8) |
| Te(1)—Fe(2) | 2.4874(6) | Cu(1)—Cu(2) | 2.5817(7) |
| Te(1)—Fe(3) | 2.4999(6) | Fe(1)—Fe(2) | 2.6350(7) |
| Te(1)—Cu(1) | 2.7929(5) | Fe(1)—Fe(3) | 2.7865(8) |
| Fe(1)—Cu(1) | 2.5165(7) | Fe(2)—Fe(3) | 2.6451(8) |
| Fe(1)—Cu(2) | 2.5797(8) | Cu(1)—C(19) | 1.925(4)  |
| Fe(3)—Cu(1) | 2.5550(7) | Cu(2)—C(29) | 1.944(4)  |

|                   |           |                   |           |
|-------------------|-----------|-------------------|-----------|
| Te(1)—Fe(1)—Cu(1) | 67.43(2)  | Te(1)—Fe(3)—Fe(1) | 56.51(2)  |
| Te(1)—Fe(1)—Cu(2) | 109.02(2) | Cu(2)—Fe(3)—Fe(1) | 57.79(2)  |
| Cu(1)—Fe(1)—Cu(2) | 60.86(2)  | Cu(1)—Fe(3)—Fe(1) | 56.01 (2) |
| Te(1)—Fe(1)—Fe(2) | 57.70(2)  | Fe(2)—Fe(3)—Fe(1) | 57.97(2)  |
| Cu(1)—Fe(1)—Fe(2) | 110.90(3) | Fe(1)—Cu(1)—Fe(3) | 66.65(2)  |
| Cu(2)—Fe(1)—Fe(2) | 100.48(3) | Fe(1)—Cu(1)—Cu(2) | 60.78(2)  |
| Te(1)—Fe(1)—Fe(3) | 55.99(2)  | Fe(3)—Cu(1)—Cu(2) | 59.08(2)  |
| Cu(1)—Fe(1)—Fe(3) | 57.34(2)  | Fe(1)—Cu(1)—Te(1) | 56.26 (2) |
| Cu(2)—Fe(1)—Fe(3) | 56.16(2)  | Fe(3)—Cu(1)—Te(1) | 55.52(2)  |
| Fe(2)—Fe(1)—Fe(3) | 58.33(2)  | Cu(2)—Cu(1)—Te(1) | 100.97(2) |
| Te(1)—Fe(2)—Fe(1) | 58.73(2)  | Fe(3)—Cu(2)—Fe(1) | 66.05(2)  |
| Te(1)—Fe(2)—Fe(3) | 58.20(2)  | Fe(3)—Cu(2)—Cu(1) | 59.94(2)  |
| Fe(1)—Fe(2)—Fe(3) | 63.71(2)  | Fe(1)—Cu(2)—Cu(1) | 58.36(2)  |
| Te(1)—Fe(3)—Cu(2) | 111.04(2) | Fe(2)—Te(1)—Fe(3) | 64.06(2)  |
| Te(1)—Fe(3)—Cu(1) | 67.07(2)  | Fe(2)—Te(1)—Fe(1) | 63.57(2)  |
| Cu(2)—Fe(3)—Cu(1) | 60.99(2)  | Fe(3)—Te(1)—Fe(1) | 67.51(2)  |
| Te(1)—Fe(3)—Fe(2) | 57.74 (2) | Fe(2)—Te(1)—Cu(1) | 106.82(2) |
| Cu(2)—Fe(3)—Fe(2) | 101.45(3) | Fe(3)—Te(1)—Cu(1) | 57.41(2)  |
| Cu(1)—Fe(3)—Fe(2) | 109.37(3) | Fe(1)—Te(1)—Cu(1) | 56.31(2)  |

**Table S7** Electronic energy and cartesian coordinates of [TeFe<sub>3</sub>(CO)<sub>9</sub>Cu<sub>2</sub>(Me<sub>2</sub>Im)<sub>2</sub>] (**1**) (PBE0/Def2-TZVP) (in gas).

E = -11297.7735507 a.u.

| atomic symbol | x         | y         | z         |
|---------------|-----------|-----------|-----------|
| C             | -0.702010 | 4.435960  | 5.669820  |
| C             | 1.824220  | 4.593340  | 5.704310  |
| C             | 0.316500  | 5.497830  | 3.539090  |
| C             | 2.198720  | 9.139990  | 5.049000  |
| C             | 1.619510  | 9.246340  | 7.513140  |
| C             | 3.210100  | 7.274810  | 6.794590  |
| C             | 0.312800  | 7.296420  | 9.329630  |
| C             | 1.828060  | 5.380230  | 8.425220  |
| C             | -0.844930 | 5.120810  | 8.421380  |
| C             | 4.304020  | 6.174030  | 3.429870  |
| C             | 3.745060  | 3.919730  | 2.544620  |
| H             | 4.098980  | 3.325680  | 1.852900  |
| H             | 2.814050  | 4.143690  | 2.335760  |
| H             | 3.784950  | 3.470080  | 3.414540  |
| C             | 5.620130  | 5.392330  | 1.789660  |
| H             | 5.966490  | 4.820760  | 1.113270  |
| C             | 6.098720  | 6.589950  | 2.134570  |
| H             | 6.853590  | 7.032690  | 1.762840  |
| C             | 5.441640  | 8.347050  | 3.786270  |
| H             | 6.216920  | 8.810530  | 3.399210  |
| H             | 5.588050  | 8.214750  | 4.746250  |
| H             | 4.636240  | 8.885760  | 3.648310  |
| C             | 0.740910  | 8.748270  | 2.234210  |
| C             | 2.278630  | 7.390680  | 0.829680  |
| H             | 2.751770  | 7.513470  | -0.019160 |
| H             | 1.680050  | 6.619360  | 0.760700  |
| H             | 2.930360  | 7.235030  | 1.546320  |
| C             | 1.449650  | 9.683890  | 0.312330  |
| H             | 1.899210  | 9.798890  | -0.517350 |
| C             | 0.646790  | 10.558970 | 0.902500  |
| H             | 0.418290  | 11.424550 | 0.584420  |
| C             | -0.700020 | 10.593560 | 3.021730  |
| H             | -0.952310 | 11.484210 | 2.699820  |

|    |           |           |           |
|----|-----------|-----------|-----------|
| H  | -0.251370 | 10.673980 | 3.889740  |
| H  | -1.501880 | 10.040150 | 3.117540  |
| N  | 4.535790  | 5.138110  | 2.592520  |
| N  | 5.279310  | 7.055170  | 3.138620  |
| N  | 1.508280  | 8.577920  | 1.128600  |
| N  | 0.207520  | 9.970970  | 2.065590  |
| O  | -1.400000 | 3.530610  | 5.880600  |
| O  | 2.599770  | 3.772730  | 5.976400  |
| O  | 0.175050  | 5.119080  | 2.460310  |
| O  | 2.647260  | 9.979620  | 4.412840  |
| O  | 1.644680  | 10.087710 | 8.289170  |
| O  | 4.237330  | 6.922870  | 7.191230  |
| O  | 0.236240  | 7.922470  | 10.278110 |
| O  | 2.740520  | 4.799140  | 8.841020  |
| O  | -1.640520 | 4.391860  | 8.800780  |
| Fe | 0.480530  | 5.673710  | 5.318410  |
| Fe | 1.653130  | 7.965970  | 6.281840  |
| Fe | 0.412820  | 6.265430  | 7.891380  |
| Cu | 2.801570  | 6.434050  | 4.609820  |
| Cu | 0.661910  | 7.693500  | 3.855830  |
| Te | -0.833080 | 7.618700  | 6.200510  |

**Table S8** Electronic energy and cartesian coordinates of [TeFe<sub>3</sub>(CO)<sub>9</sub>Cu<sub>2</sub>(MeImCH<sub>2</sub>ImMe)]  
(2) (PBE0/Def2-TZVP) (in gas).

E = -11257.0567454 a.u.

| atomic symbol | x         | y         | z        |
|---------------|-----------|-----------|----------|
| C             | 15.728990 | 2.597350  | 4.075710 |
| C             | 18.194300 | 2.340360  | 4.758590 |
| C             | 16.416480 | 1.121690  | 6.331360 |
| C             | 15.459330 | 5.383800  | 8.758430 |
| C             | 13.591620 | 4.040680  | 7.590320 |
| C             | 11.988590 | 0.339420  | 6.513080 |
| H             | 11.257820 | -0.307090 | 6.603950 |
| H             | 12.078480 | 0.850160  | 7.344900 |
| H             | 12.824230 | -0.137380 | 6.331360 |
| C             | 10.535380 | 1.213820  | 4.670540 |
| H             | 9.816260  | 0.601250  | 4.772640 |
| C             | 10.613620 | 2.204590  | 3.785330 |
| H             | 9.962750  | 2.434100  | 3.130550 |
| C             | 12.501300 | 2.243380  | 5.029300 |
| C             | 12.261590 | 4.040680  | 3.337570 |
| H             | 13.250380 | 4.040680  | 3.292610 |
| H             | 11.917020 | 4.040680  | 2.409270 |
| N             | 11.699280 | 1.247760  | 5.414300 |
| N             | 11.821470 | 2.838170  | 4.002650 |
| O             | 15.317830 | 2.459960  | 3.010650 |
| O             | 19.168770 | 2.091450  | 4.198420 |
| O             | 16.258340 | 0.087280  | 6.813770 |
| O             | 15.474970 | 6.238800  | 9.514370 |
| O             | 12.507950 | 4.040680  | 7.970640 |
| Fe            | 16.679490 | 2.706930  | 5.586280 |
| Fe            | 15.393240 | 4.040680  | 7.603530 |
| Cu            | 14.220350 | 2.766570  | 5.760050 |
| Te            | 17.850400 | 4.040680  | 7.297130 |
| Cu            | 14.220350 | 5.314780  | 5.760050 |
| N             | 11.821470 | 5.243180  | 4.002650 |
| Fe            | 16.679490 | 5.374420  | 5.586280 |
| C             | 15.459330 | 2.697550  | 8.758430 |
| C             | 15.728990 | 5.484000  | 4.075710 |

|   |           |          |          |
|---|-----------|----------|----------|
| C | 16.416480 | 6.959660 | 6.331360 |
| C | 12.501300 | 5.837970 | 5.029300 |
| C | 10.613620 | 5.876760 | 3.785330 |
| C | 18.194300 | 5.740990 | 4.758590 |
| O | 15.474970 | 1.842550 | 9.514370 |
| O | 15.317830 | 5.621390 | 3.010650 |
| O | 16.258340 | 7.994070 | 6.813770 |
| N | 11.699280 | 6.833590 | 5.414300 |
| C | 10.535380 | 6.867530 | 4.670540 |
| H | 9.962750  | 5.647250 | 3.130550 |
| O | 19.168770 | 5.989900 | 4.198420 |
| C | 11.988590 | 7.741930 | 6.513080 |
| H | 9.816260  | 7.480100 | 4.772640 |
| H | 11.257820 | 8.388440 | 6.603950 |
| H | 12.078480 | 7.231190 | 7.344900 |
| H | 12.824230 | 8.218730 | 6.331360 |

**Table S9** Electronic energy and cartesian coordinates of [TeFe<sub>3</sub>(CO)<sub>9</sub>Cu<sub>2</sub>(MeIm(CH<sub>2</sub>)<sub>2</sub>ImMe)]  
(**3**) (PBE0/Def2-TZVP) (in gas).

E = -11296.7983211 a.u.

| atomic symbol | x        | y         | z        |
|---------------|----------|-----------|----------|
| Te            | 1.208800 | 9.157380  | 4.009490 |
| Cu            | 2.834050 | 8.137230  | 5.873820 |
| Cu            | 5.049800 | 7.701050  | 4.545840 |
| Fe            | 2.369050 | 9.248390  | 1.813590 |
| Fe            | 2.743630 | 7.224090  | 3.472230 |
| Fe            | 3.649720 | 9.747070  | 4.091060 |
| O             | 0.028320 | 8.483210  | 0.233220 |
| O             | 2.346360 | 12.023240 | 0.923000 |
| O             | 4.496500 | 8.311620  | 0.031620 |
| O             | 4.978310 | 5.905530  | 2.110850 |
| O             | 0.894340 | 5.781330  | 1.739280 |
| O             | 2.208480 | 5.165990  | 5.488610 |
| O             | 4.867110 | 10.204790 | 6.704130 |
| O             | 3.156710 | 12.633820 | 3.986510 |
| O             | 6.079980 | 9.775070  | 2.462660 |
| N             | 1.801050 | 7.907540  | 8.645010 |
| N             | 3.528350 | 6.701760  | 8.336680 |
| N             | 6.850070 | 6.676680  | 6.654720 |
| N             | 7.758410 | 6.486480  | 4.735580 |
| C             | 0.955120 | 8.758410  | 0.843950 |
| C             | 2.347870 | 10.942540 | 1.304460 |
| C             | 3.662770 | 8.646860  | 0.755000 |
| C             | 4.148170 | 6.493910  | 2.701810 |
| C             | 1.620830 | 6.392930  | 2.397440 |
| C             | 2.474210 | 6.056120  | 4.798830 |
| C             | 4.319770 | 9.895410  | 5.727760 |
| C             | 3.327110 | 11.501340 | 4.012200 |
| C             | 5.118660 | 9.701780  | 3.089200 |
| C             | 2.703830 | 7.579380  | 7.714100 |
| C             | 0.717510 | 8.839790  | 8.425620 |
| H             | 0.184660 | 8.920410  | 9.245850 |
| H             | 0.148270 | 8.512920  | 7.698280 |
| H             | 1.082780 | 9.715910  | 8.186470 |



|   |          |          |           |
|---|----------|----------|-----------|
| C | 2.040900 | 7.240120 | 9.842740  |
| H | 1.530940 | 7.303880 | 10.641220 |
| C | 3.141700 | 6.482620 | 9.643110  |
| H | 3.565080 | 5.914320 | 10.275580 |
| C | 4.679330 | 6.101670 | 7.688400  |
| H | 4.446150 | 5.879380 | 6.751560  |
| H | 4.911670 | 5.257790 | 8.150890  |
| C | 5.892600 | 7.028680 | 7.696310  |
| H | 5.591830 | 7.963040 | 7.561910  |
| H | 6.337190 | 6.976760 | 8.579780  |
| C | 8.083540 | 6.077890 | 6.850390  |
| H | 8.451880 | 5.805150 | 7.682470  |
| C | 8.653020 | 5.959150 | 5.670440  |
| H | 9.507850 | 5.585580 | 5.488610  |
| C | 8.037490 | 6.579790 | 3.300680  |
| H | 8.917440 | 6.190750 | 3.114890  |
| H | 8.030650 | 7.519750 | 3.027930  |
| H | 7.350040 | 6.089300 | 2.802610  |
| C | 6.639960 | 6.922250 | 5.336420  |

**Table S10** Electronic energy and cartesian coordinates of [TeFe<sub>3</sub>(CO)<sub>9</sub>Cu<sub>2</sub>(MeIm(CH<sub>2</sub>)<sub>3</sub>ImMe)] (**4**) (PBE0/Def2-TZVP) (in gas).

E = -11335.9868279 a.u.

| atomic symbol | x         | y         | z         |
|---------------|-----------|-----------|-----------|
| C             | 9.144640  | 9.829650  | 5.803080  |
| C             | 8.103300  | 11.401990 | 4.031390  |
| C             | 9.907040  | 9.712710  | 3.174940  |
| C             | 7.226340  | 10.711440 | 1.236660  |
| C             | 5.886620  | 8.511310  | 0.872130  |
| C             | 8.599730  | 8.396500  | 0.958360  |
| C             | 6.344430  | 6.226400  | 2.665380  |
| C             | 8.850070  | 6.283990  | 2.880960  |
| C             | 7.232720  | 6.026960  | 5.077940  |
| C             | 7.355670  | 7.698200  | 7.862870  |
| C             | 4.888710  | 7.966590  | 7.815830  |
| H             | 4.149120  | 7.831020  | 8.444940  |
| H             | 4.747690  | 7.413240  | 7.020140  |
| H             | 4.927270  | 8.911310  | 7.555170  |
| C             | 6.237230  | 7.126580  | 9.744310  |
| H             | 5.519400  | 6.983060  | 10.349900 |
| C             | 7.514660  | 6.924410  | 9.973610  |
| H             | 7.895120  | 6.599420  | 10.781070 |
| C             | 9.626640  | 7.264330  | 8.729120  |
| H             | 10.017020 | 6.927550  | 9.573810  |
| H             | 9.949390  | 8.190190  | 8.588010  |
| C             | 10.109900 | 6.336100  | 7.504220  |
| H             | 9.906090  | 5.386770  | 7.696280  |
| H             | 9.641300  | 6.596840  | 6.673250  |
| C             | 11.525360 | 6.516470  | 7.351350  |
| H             | 12.002920 | 5.964590  | 8.019660  |
| H             | 11.756530 | 7.464660  | 7.514020  |
| C             | 13.107580 | 5.409930  | 5.820720  |
| H             | 13.575580 | 4.907720  | 6.477260  |
| C             | 13.436040 | 5.546600  | 4.548780  |
| H             | 14.179460 | 5.148520  | 4.111740  |
| C             | 12.593920 | 6.886800  | 2.614420  |
| H             | 13.359540 | 6.473590  | 2.163660  |

|    |           |           |          |
|----|-----------|-----------|----------|
| H  | 12.714020 | 7.858860  | 2.637940 |
| H  | 11.771760 | 6.670420  | 2.126420 |
| C  | 11.551130 | 6.743540  | 4.858440 |
| N  | 6.148930  | 7.586790  | 8.456110 |
| N  | 8.204980  | 7.267990  | 8.829460 |
| N  | 11.957110 | 6.132300  | 6.004940 |
| N  | 12.498760 | 6.376060  | 3.976510 |
| O  | 9.743680  | 10.109030 | 6.764770 |
| O  | 7.913820  | 12.531840 | 3.951030 |
| O  | 10.860140 | 9.892270  | 2.544650 |
| O  | 7.238120  | 11.755130 | 0.764920 |
| O  | 5.001900  | 8.184100  | 0.230280 |
| O  | 9.476400  | 8.000600  | 0.333170 |
| O  | 5.617850  | 5.581950  | 2.049990 |
| O  | 9.575360  | 5.627860  | 2.267340 |
| O  | 7.012770  | 5.180340  | 5.807390 |
| Fe | 8.446490  | 9.673650  | 4.169750 |
| Fe | 7.236560  | 9.064290  | 1.889870 |
| Fe | 7.482700  | 7.119270  | 3.661370 |
| Cu | 7.677570  | 8.152260  | 6.012190 |
| Cu | 9.892100  | 7.669300  | 4.470980 |
| Te | 6.001700  | 9.113280  | 4.042280 |

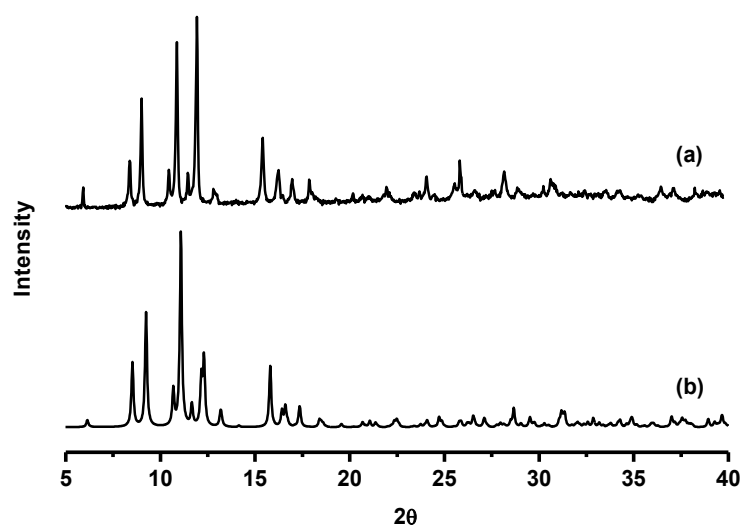

**Fig. S1** Powder X-ray diffraction (PXRD) patterns for (a) Crystals of **1** exposure to air for 10 days; (b) Calculated pattern for **1**.

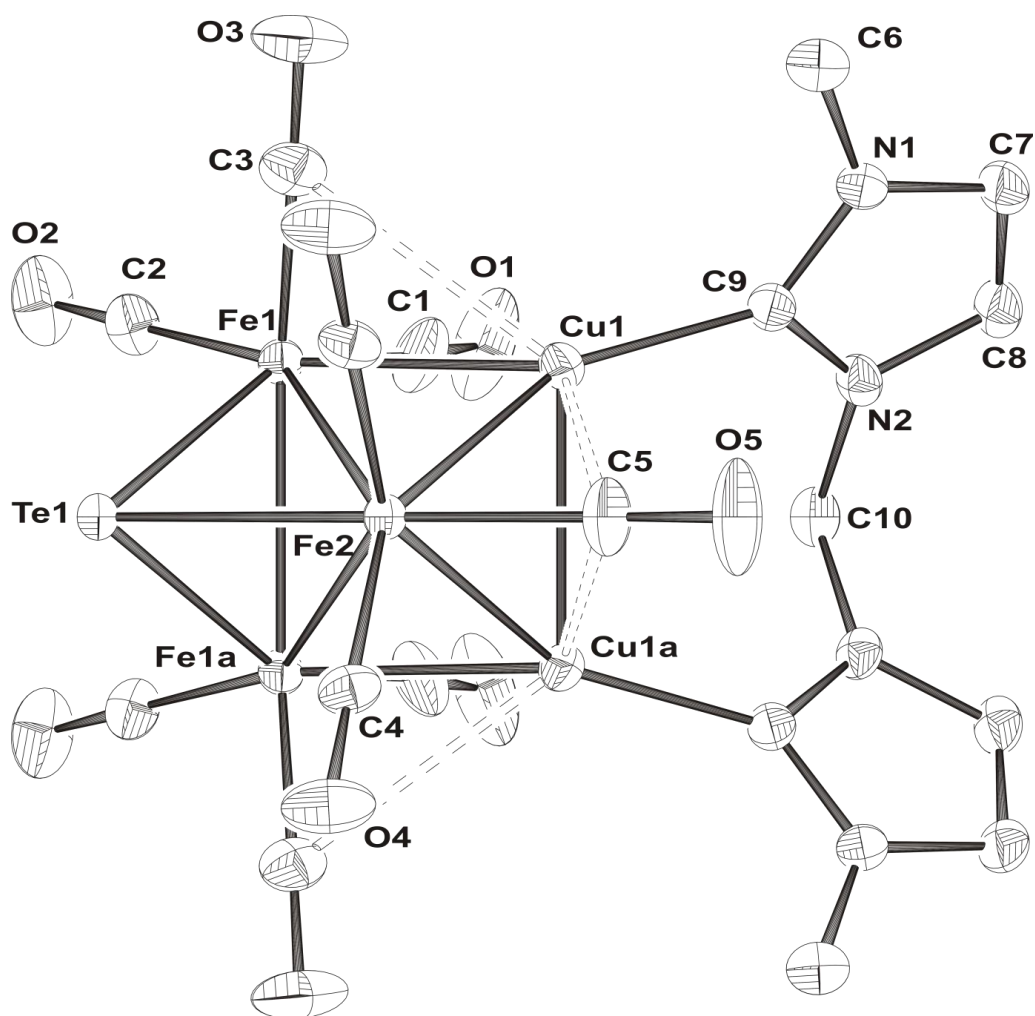

**Fig. S2** ORTEP of **2** at 30% probability and hydrogen atoms are omitted for clarity. The atoms with an additional label (a) are at the equivalent position  $(x, 1/2 - y, z)$ .

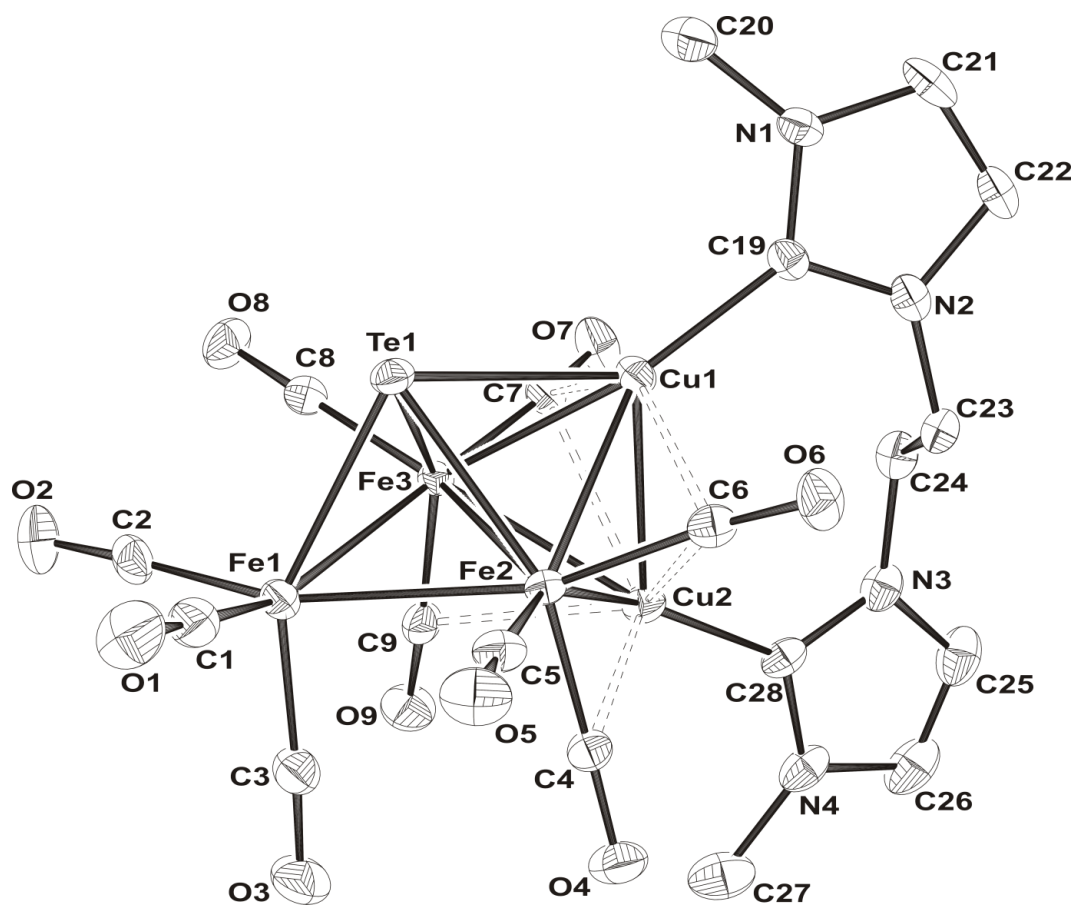

**Fig. S3** ORTEP of **3** at 30% probability and hydrogen atoms are omitted for clarity.

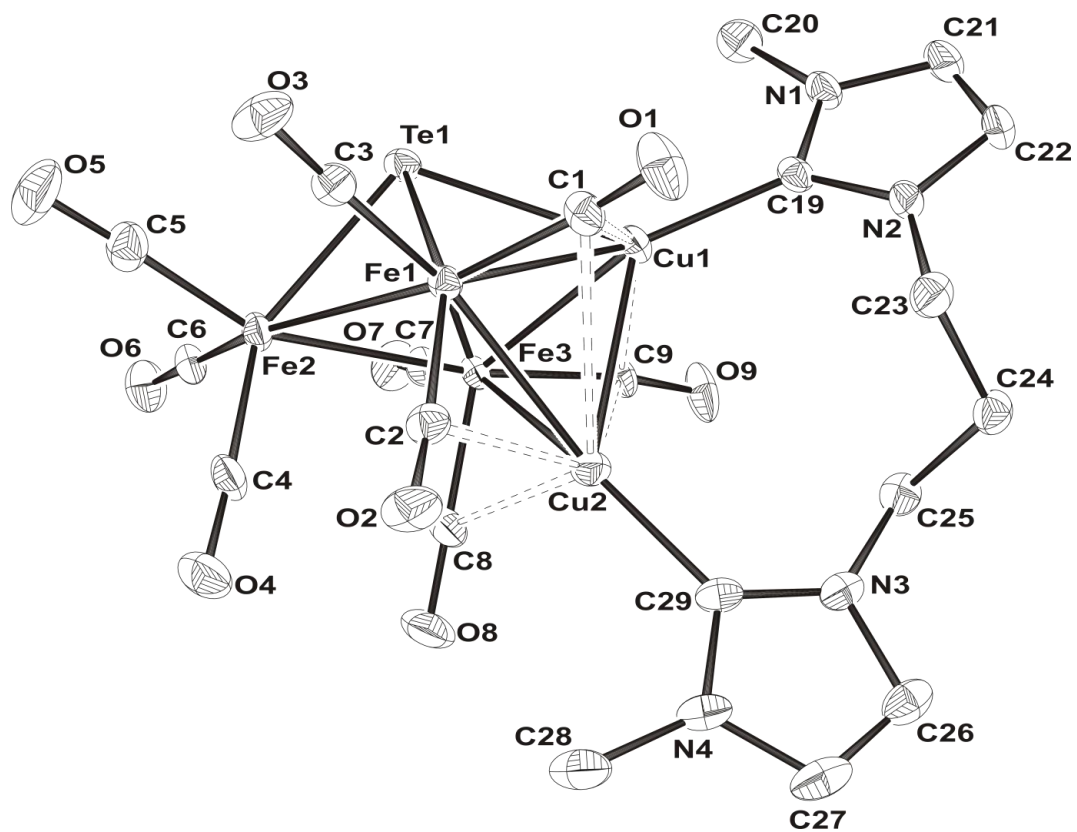

**Fig. S4** ORTEP of **4** at 30% probability and hydrogen atoms are omitted for clarity.

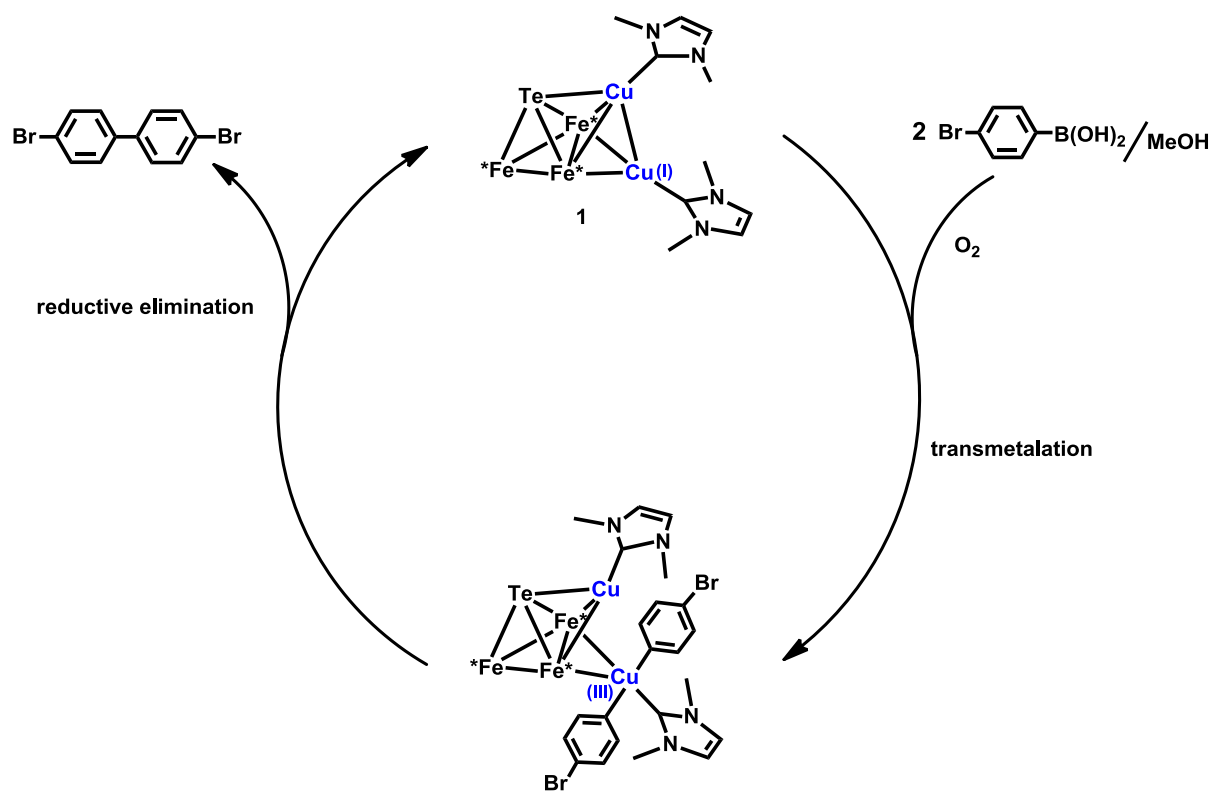

**Fig. S5** The proposed mechanism using the model complex **1** as the catalyst for the homocoupling of 4-bromophenylboronic acid to 4,4'-dibromobiphenyl.<sup>19,28</sup>



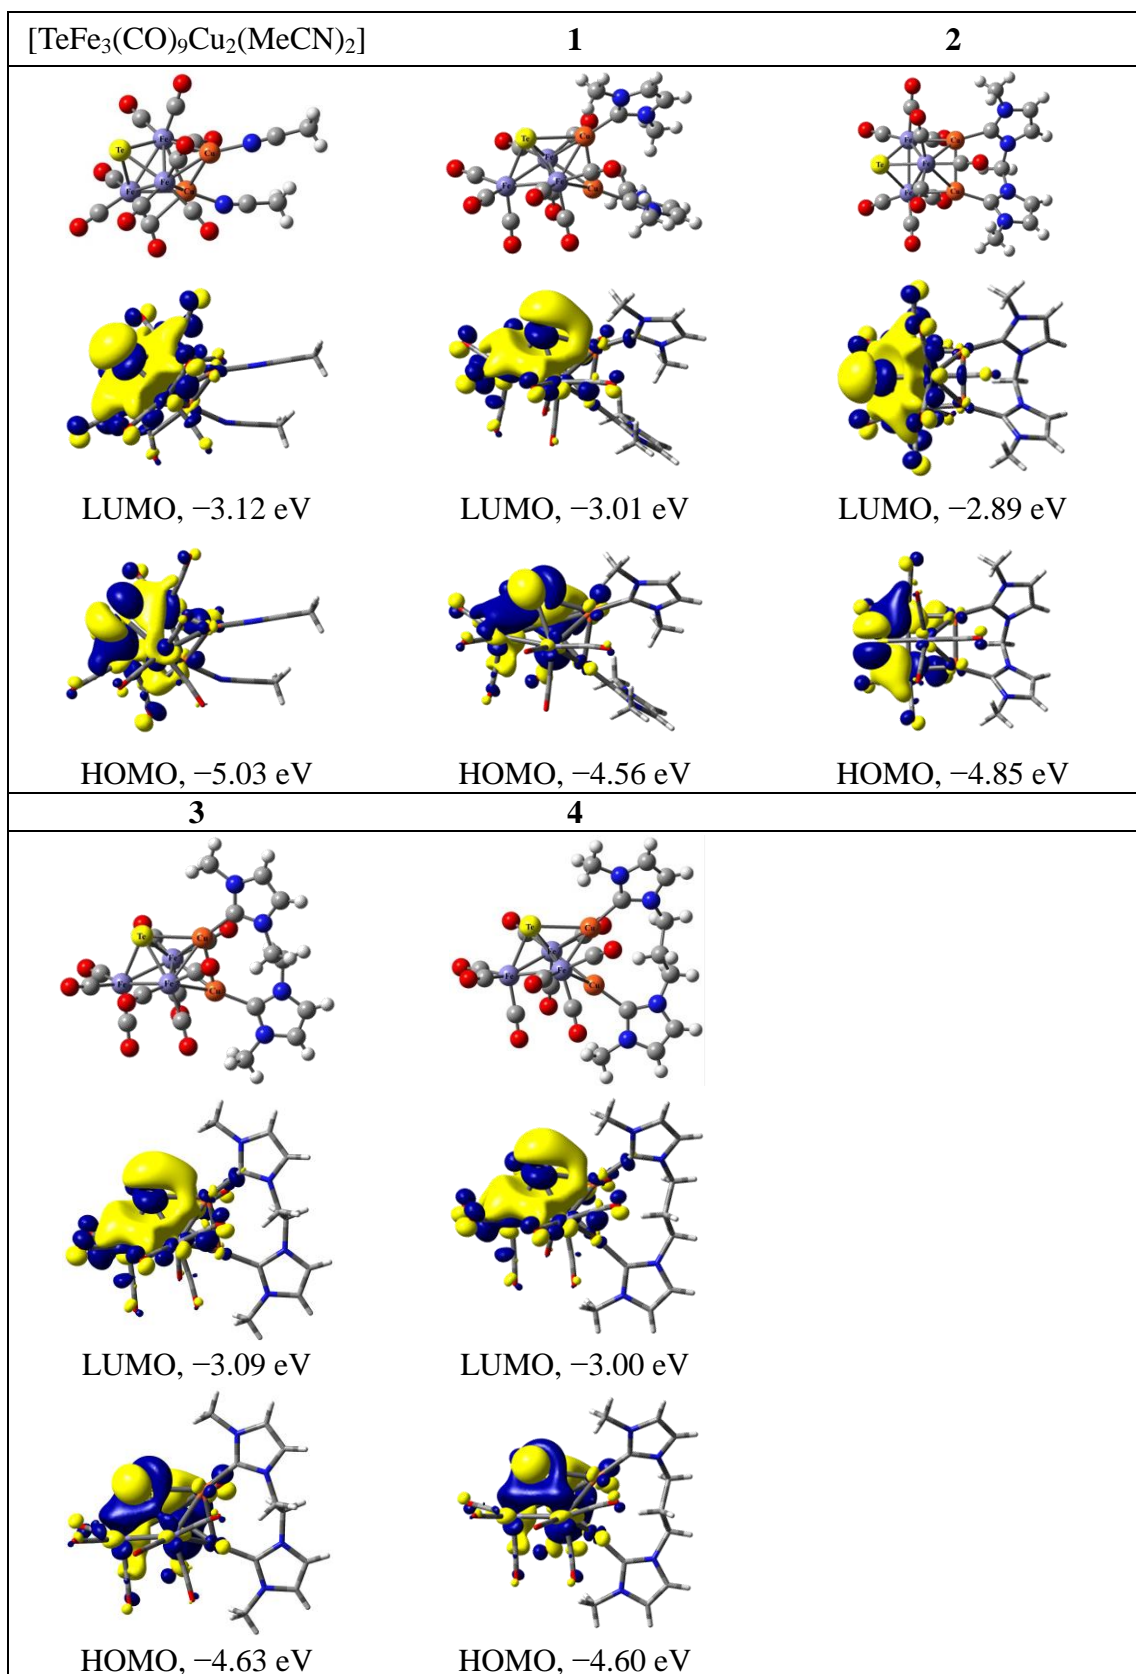

**Fig. S6** Spatial graphs (isovalue = 0.03) of the selected frontier molecular orbitals and their associated energies of [TeFe<sub>3</sub>(CO)<sub>9</sub>Cu<sub>2</sub>(MeCN)<sub>2</sub>] and 1–4.

| ArX <sup>a</sup>                                        | Yield (%)       | Product ratio | K <sub>Ar</sub> /K <sub>ArBr</sub> | log (K <sub>ArX</sub> /K <sub>ArBr</sub> ) |
|---------------------------------------------------------|-----------------|---------------|------------------------------------|--------------------------------------------|
| <i>p</i> -BrC <sub>6</sub> H <sub>4</sub>               | 88              | 88/88         | 1                                  | 0                                          |
| <i>p</i> -OMeC <sub>6</sub> H <sub>4</sub>              | 70              | 70/88         | 0.795                              | -0.100                                     |
| <i>p</i> -NO <sub>2</sub> C <sub>6</sub> H <sub>4</sub> | 99 <sup>b</sup> | 99/88         | 1.125                              | 0.051                                      |
| <i>m</i> -BrC <sub>6</sub> H <sub>4</sub>               | 68              | 68/68         | 1                                  | 0                                          |
| <i>m</i> -NO <sub>2</sub> C <sub>6</sub> H <sub>4</sub> | 97              | 97/68         | 1.426                              | 0.154                                      |

<sup>a</sup> X = substituents. <sup>b</sup> 78%/79% (based on 78% yield of 4,4'-dinitrophenyl and 21% yield of 4-nitrophenol).

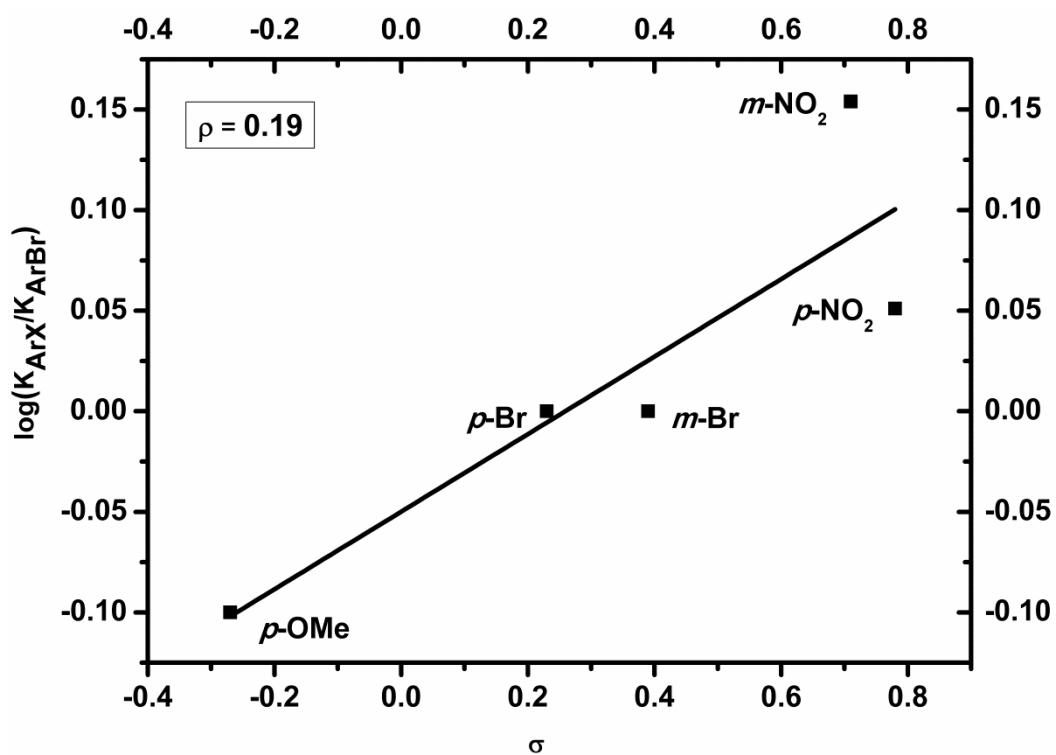

**Fig. S7** Correlation of product ratios with the Hammett equation.  $y = 0.19x - 0.05$ ;  $R^2 = 0.70$ .

## Spectroscopic data of products

### 2,2'-dibromobiphenyl

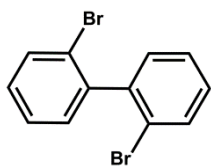

$^1\text{H}$  NMR (400 MHz, DMSO, ppm):  $\delta$  7.72 (dd, 2H,  $J = 7.6, 1.4$  Hz), 7.46 (td, 2H,  $J = 7.6, 1.4$  Hz), 7.35 (td, 2H,  $J = 7.6, 1.4$  Hz), 7.28 (dd, 2H,  $J = 7.6, 1.4$  Hz);  $^{13}\text{C}$  NMR (100 MHz, DMSO, ppm):  $\delta$  141.95, 132.81, 131.52, 130.42, 128.15, 123.21

### 3,3'-dibromobiphenyl

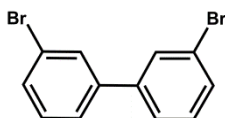

$^1\text{H}$  NMR (400 MHz,  $\text{CDCl}_3$ , ppm):  $\delta$  7.71 (t, 2H,  $J = 1.8$  Hz), 7.53–7.48 (m, 4H), 7.32 (t, 2H,  $J = 7.8$  Hz);  $^{13}\text{C}$  NMR (100 MHz,  $\text{CDCl}_3$ , ppm):  $\delta$  141.82, 130.83, 130.39, 130.19, 125.75, 123.00

### 3,3'-dinitrobiphenyl

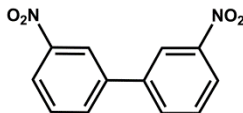

$^1\text{H}$  NMR (400 MHz,  $\text{CDCl}_3$ , ppm):  $\delta$  8.50 (t, 2H,  $J = 1.8$  Hz), 8.30 (m, 2H), 7.97 (m, 2H), 7.70 (t, 2H,  $J = 8.0$  Hz);  $^{13}\text{C}$  NMR (100 MHz,  $\text{CDCl}_3$ , ppm):  $\delta$  148.90, 140.35, 133.07, 130.31, 123.31, 122.12

### 4,4'-dibromobiphenyl

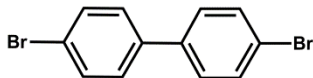

$^1\text{H}$  NMR (400 MHz,  $\text{CDCl}_3$ , ppm):  $\delta$  7.56 (dd, 4H,  $J = 8.4$  Hz), 7.41 (dd, 4H,  $J = 8.4$  Hz);  $^{13}\text{C}$  NMR (100 MHz,  $\text{CDCl}_3$ , ppm):  $\delta$  138.93, 132.03, 128.52, 121.96

### 4,4'-dimethoxybiphenyl

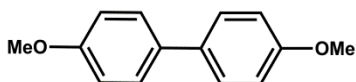

$^1\text{H}$  NMR (400 MHz,  $\text{CDCl}_3$ , ppm):  $\delta$  7.49 (dd, 4H,  $J = 8.6$  Hz), 6.97 (dd, 4H,  $J = 8.6$  Hz), 3.85 (s, 6H);  $^{13}\text{C}$  NMR (100 MHz,  $\text{CDCl}_3$ , ppm):  $\delta$  158.71, 133.51, 127.73, 114.17, 55.35

### 4,4'-dinitrobiphenyl

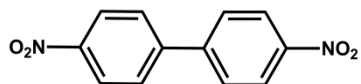

<sup>1</sup>H NMR (400 MHz, CDCl<sub>3</sub>, ppm):  $\delta$  8.38 (dd, 4H,  $J = 8.8$  Hz), 7.80 (dd, 4H,  $J = 8.8$  Hz);

<sup>13</sup>C NMR (100 MHz, CDCl<sub>3</sub>, ppm):  $\delta$  148.10, 144.99, 128.33, 124.39

### 4-nitrophenol

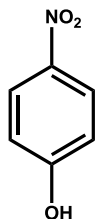

<sup>1</sup>H NMR (400 MHz, CDCl<sub>3</sub>, ppm):  $\delta$  8.17 (dd, 2H,  $J = 9.2$  Hz), 6.90 (dd, 2H,  $J = 9.2$  Hz),

5.93 (s, 1H); <sup>13</sup>C NMR (100 MHz, CDCl<sub>3</sub>, ppm):  $\delta$  161.82, 141.39, 126.38, 115.83

<sup>1</sup>H NMR (400 MHz, DMSO, 25 °C)

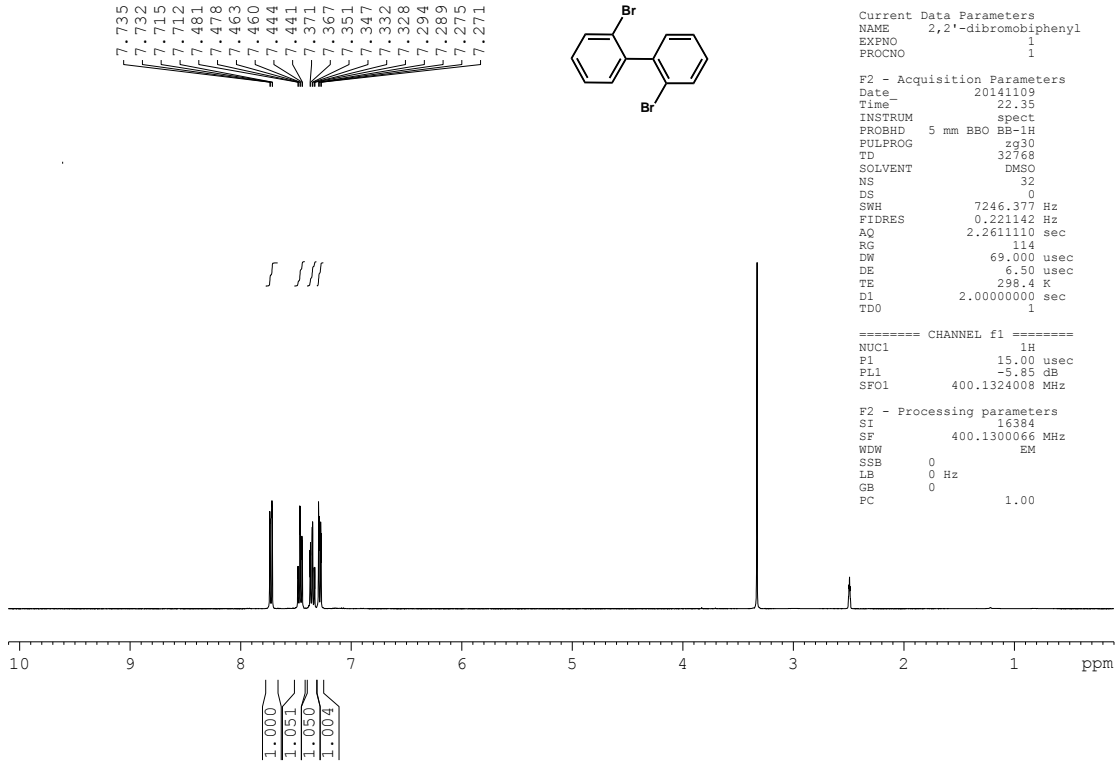

<sup>13</sup>C{<sup>1</sup>H} NMR (100 MHz, DMSO, 25 °C)

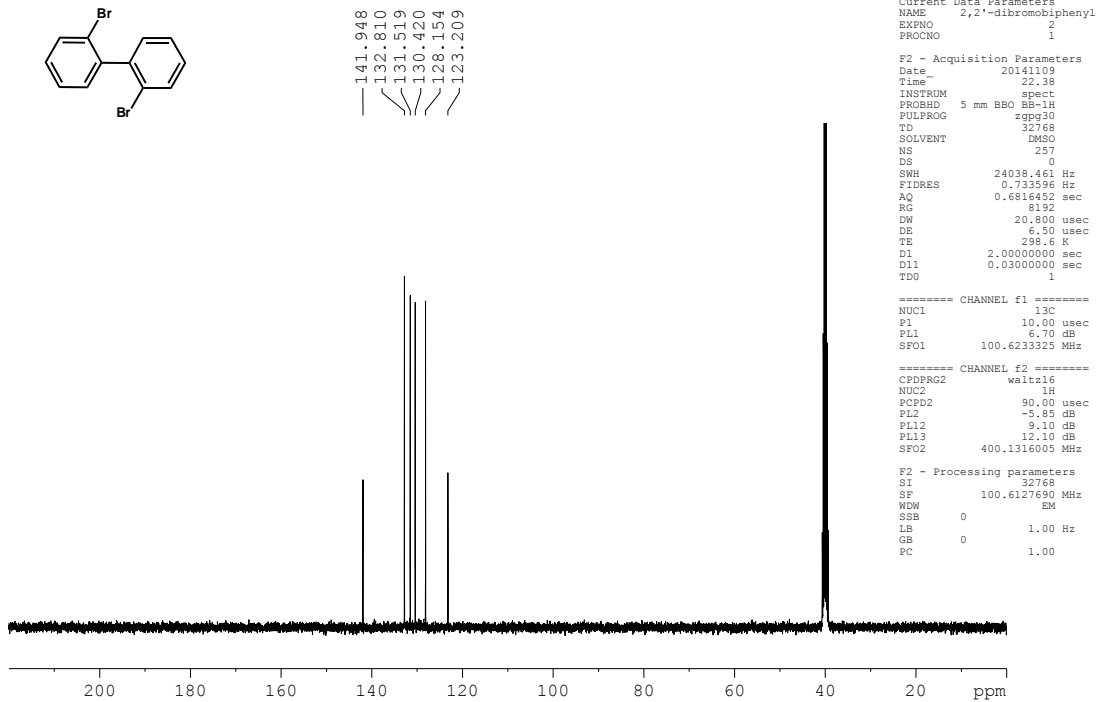

<sup>1</sup>H NMR (400 MHz, CDCl<sub>3</sub>, 25 °C)

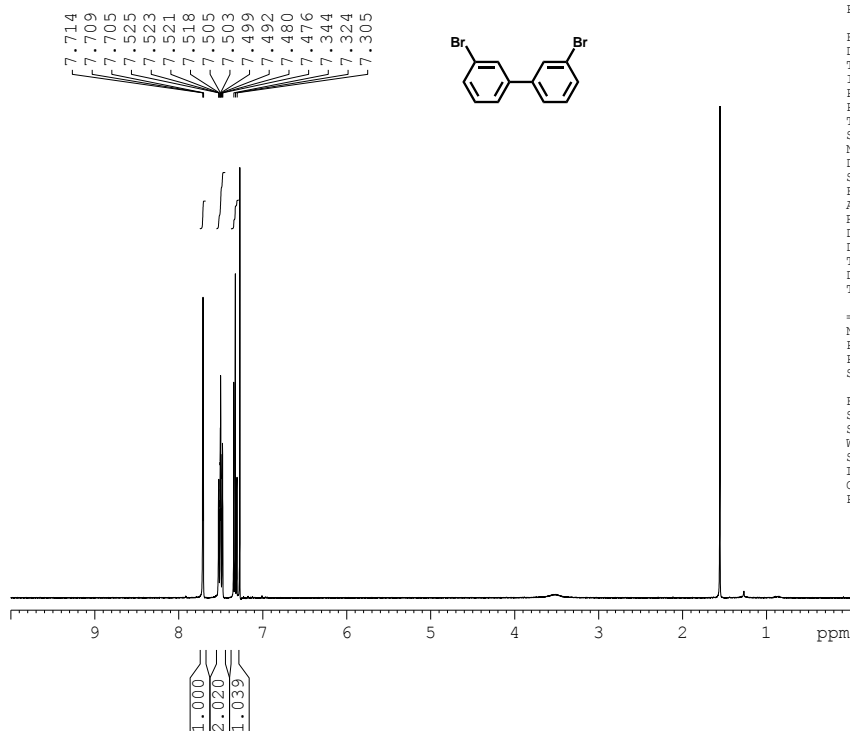

Current Data Parameters  
NAME 3,3'-dibromobiphenyl  
EXPNO 1  
PROCNO 1

F2 - Acquisition Parameters  
Date\_ 20141109  
Time\_ 20.29  
INSTRUM spect  
PROBHD 5 mm BBO BB-1H  
PULPROG zg30  
TD 32768  
SOLVENT CDCl3  
NS 32  
DS 0  
SWH 7246.377 Hz  
FIDRES 0.221142 Hz  
AQ 2.261110 sec  
RG 114  
DW 69.000 usec  
DE 6.50 usec  
TE 298.4 K  
D1 2.0000000 sec  
TD0 1

===== CHANNEL f1 =====  
NUC1 1H  
P1 15.00 usec  
PL1 -5.85 dB  
SFO1 400.1324008 MHz

F2 - Processing parameters  
SI 16384  
SF 400.1300052 MHz  
WDW EM  
SSB 0  
LB 0 Hz  
GB 0  
PC 1.00

<sup>13</sup>C(1H) NMR (100 MHz, CDCl<sub>3</sub>, 25 °C)

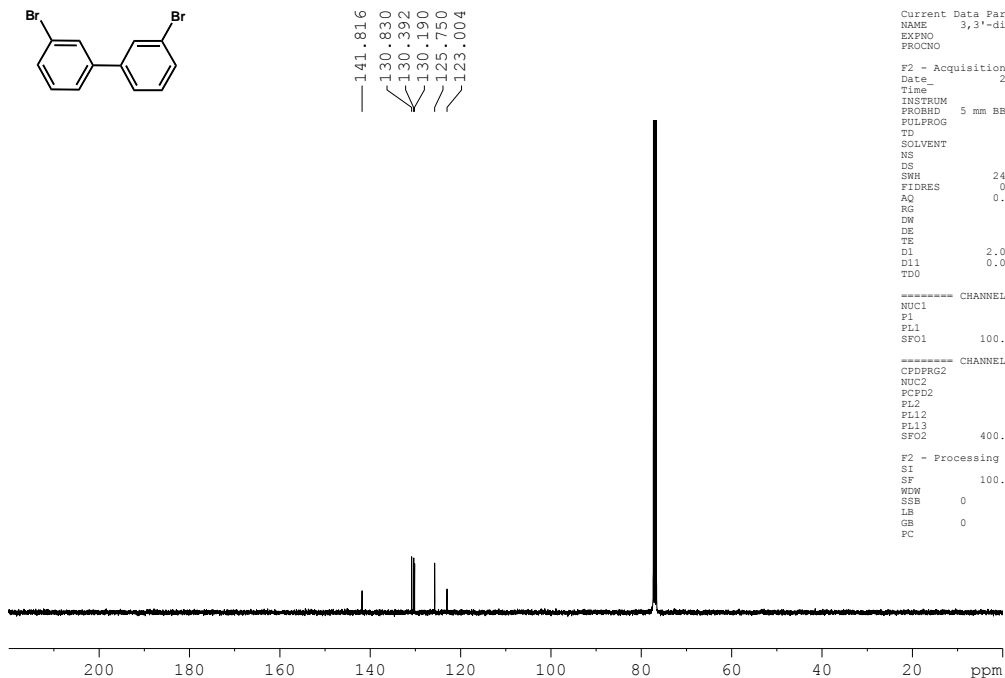

Current Data Parameters  
NAME 3,3'-dibromobiphenyl  
EXPNO 2  
PROCNO 1

F2 - Acquisition Parameters  
Date\_ 20141109  
Time\_ 21.14  
INSTRUM spect  
PROBHD 5 mm BBO BB-1H  
PULPROG zgpg30  
TD 32768  
SOLVENT cdcl3  
NS 973  
DS 0  
SWH 24038.461 Hz  
FIDRES 0.733596 Hz  
AQ 0.6816452 sec  
RG 4096  
DW 20.800 usec  
DE 6.50 usec  
TE 299.3 K  
D1 2.0000000 sec  
D11 0.0300000 sec  
TD0 1

===== CHANNEL f1 =====  
NUC1 13C  
P1 10.00 usec  
PL1 6.70 dB  
SFO1 100.6233325 MHz

===== CHANNEL f2 =====  
CPDPRG2 waltz16  
NUC2 1H  
PCPD2 90.00 usec  
PL2 -5.85 dB  
PL12 9.10 dB  
PL13 12.10 dB  
SFO2 400.1316005 MHz

F2 - Processing parameters  
SI 32768  
SF 100.6127690 MHz  
WDW EM  
SSB 0  
LB 1.00 Hz  
GB 0  
PC 1.00

<sup>1</sup>H NMR (400 MHz, CDCl<sub>3</sub>, 25 °C)

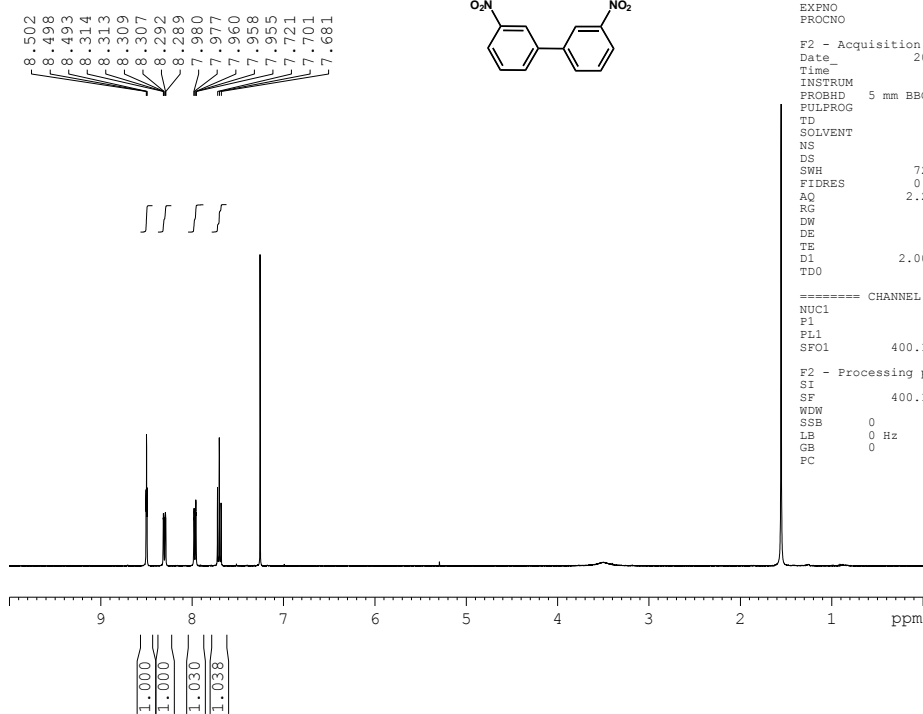

```

Current Data Parameters
NAME      3,3'-dinitro biphenyl
EXPNO    1
PROCNO   1

F2 - Acquisition Parameters
Date_    20141215
Time     23.35
INSTRUM spect
PROBHD   5 mm BBO BB-1H
PULPROG zg30
TD       32768
SOLVENT  CDCl3
NS       32
DS       0
SWH      7246.377 Hz
FIDRES   0.221142 Hz
AQ       2.261110 sec
RG       114
DW       69.000 usec
DE       6.50 usec
TE       298.2 K
D1       2.00000000 sec
TD0      1

===== CHANNEL f1 =====
NUC1     1H
P1       15.00 usec
PL1      -5.85 dB
SFO1    400.1324008 MHz

F2 - Processing parameters
SI       16384
SF       400.1300118 MHz
WDW      EM
SSB      0
LB       0 Hz
GB       0
PC       1.00
    
```

<sup>13</sup>C(1H) NMR (100 MHz, CDCl<sub>3</sub>, 25 °C)

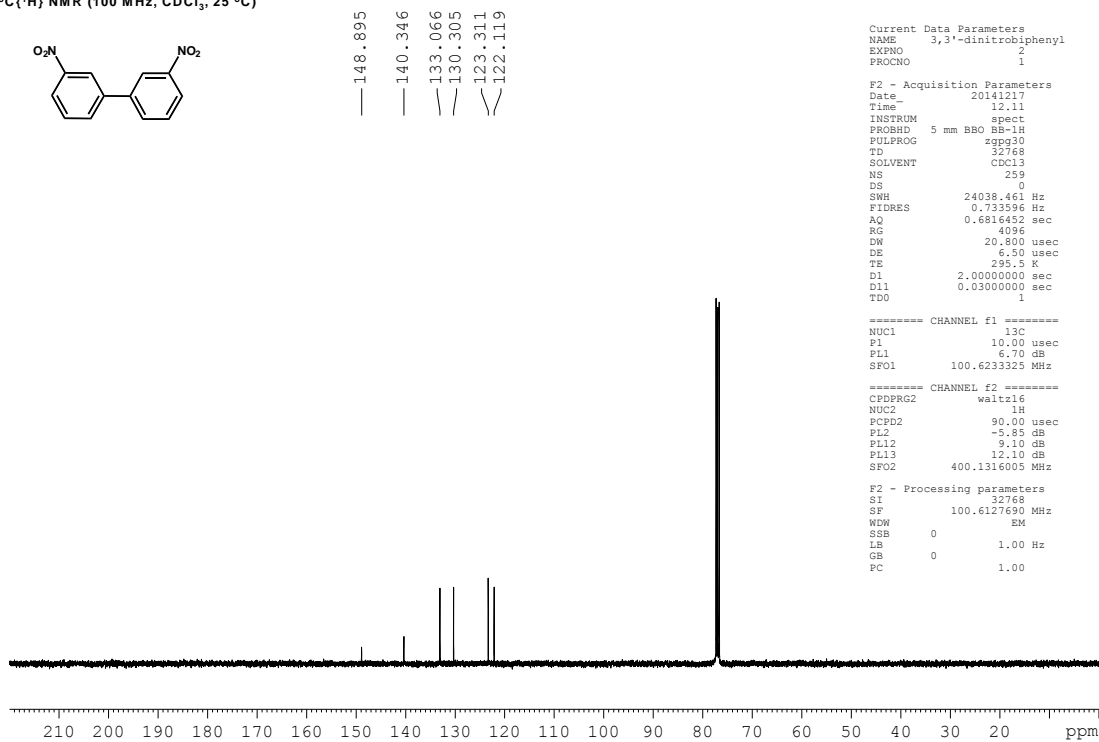

```

Current Data Parameters
NAME      3,3'-dinitro biphenyl
EXPNO    2
PROCNO   1

F2 - Acquisition Parameters
Date_    20141217
Time     12.11
INSTRUM spect
PROBHD   5 mm BBO BB-1H
PULPROG zgpg30
TD       32768
SOLVENT  CDCl3
NS       259
DS       0
SWH      24038.461 Hz
FIDRES   0.133596 Hz
AQ       0.6816452 sec
RG       4096
DW       20.800 usec
DE       6.50 usec
TE       295.5 K
D1       2.00000000 sec
D11      0.03000000 sec
TD0      1

===== CHANNEL f1 =====
NUC1     13C
P1       10.00 usec
PL1      6.70 dB
SFO1    100.6233325 MHz

===== CHANNEL f2 =====
CPDPRG2 waltz16
NUC2     1H
PCPD2   90.00 usec
PL2     -5.85 dB
PL12    9.10 dB
PL13    12.10 dB
SFO2    400.1316005 MHz

F2 - Processing parameters
SI       32768
SF       100.6127690 MHz
WDW      EM
SSB      0
LB       1.00 Hz
GB       0
PC       1.00
    
```

<sup>1</sup>H NMR (400 MHz, CDCl<sub>3</sub>, 25 °C)

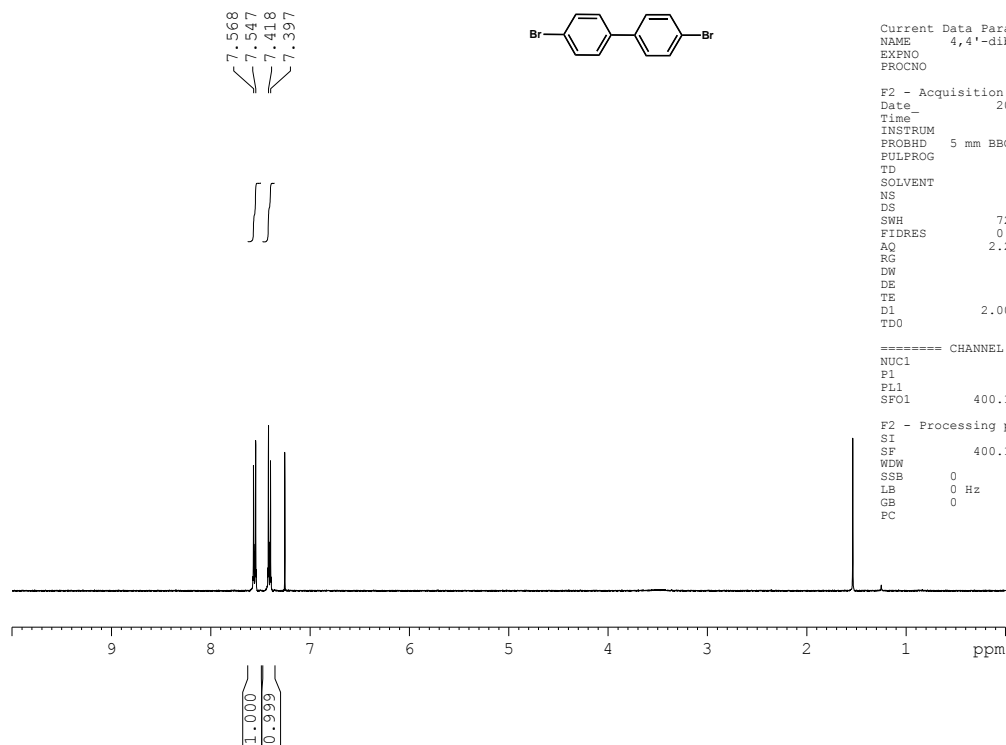

<sup>13</sup>C{<sup>1</sup>H} NMR (100 MHz, CDCl<sub>3</sub>, 25 °C)

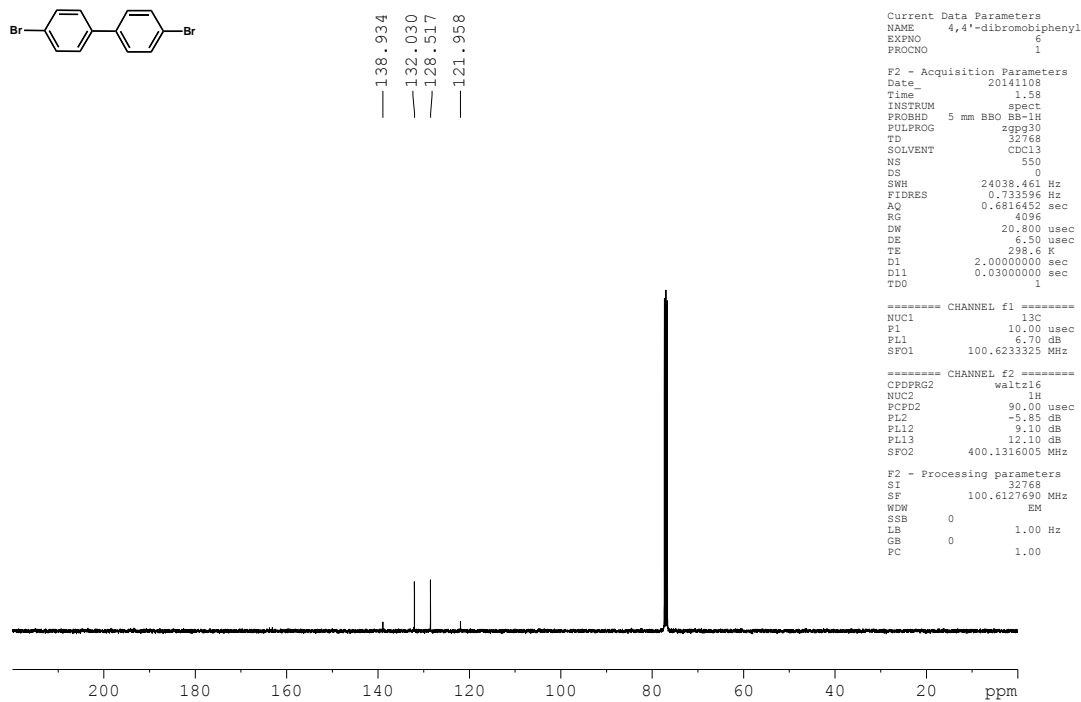



<sup>1</sup>H NMR (400 MHz, CDCl<sub>3</sub>, 25 °C)

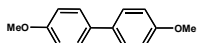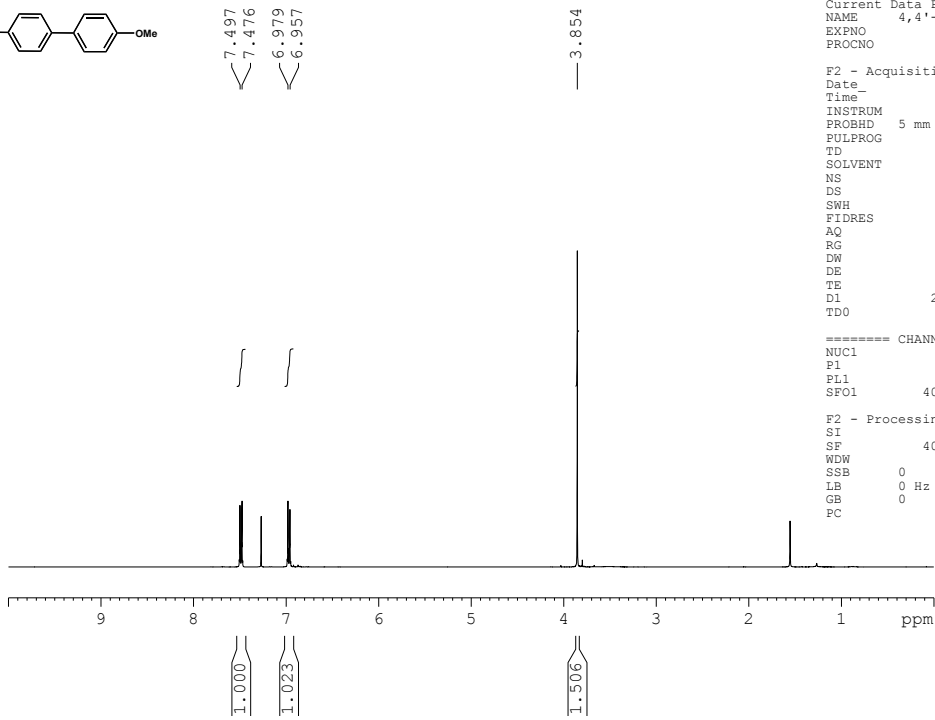

Current Data Parameters  
NAME 4,4'-dimethoxybiphenyl  
EXPNO 2  
PROCNO 1

F2 - Acquisition Parameters  
Date\_ 20141107  
Time 22.39  
INSTRUM spect  
PROBHD 5 mm BBO BB-1H  
PULPROG zg30  
TD 32768  
SOLVENT CDCl3  
NS 32  
DS 0  
SWH 7246.377 Hz  
FIDRES 0.221142 Hz  
AQ 2.2611110 sec  
RG 114  
DW 69.000 usec  
DE 6.50 usec  
TE 298.1 K  
D1 2.0000000 sec  
TDO 1

===== CHANNEL f1 =====  
NUC1 1H  
P1 15.00 usec  
PL1 -5.85 dB  
SFO1 400.1324008 MHz

F2 - Processing parameters  
SI 16384  
SF 400.1300058 MHz  
WDW EM  
SSB 0  
LB 0 Hz  
GB 0  
PC 1.00

<sup>13</sup>C NMR (100 MHz, CDCl<sub>3</sub>, 25 °C)

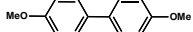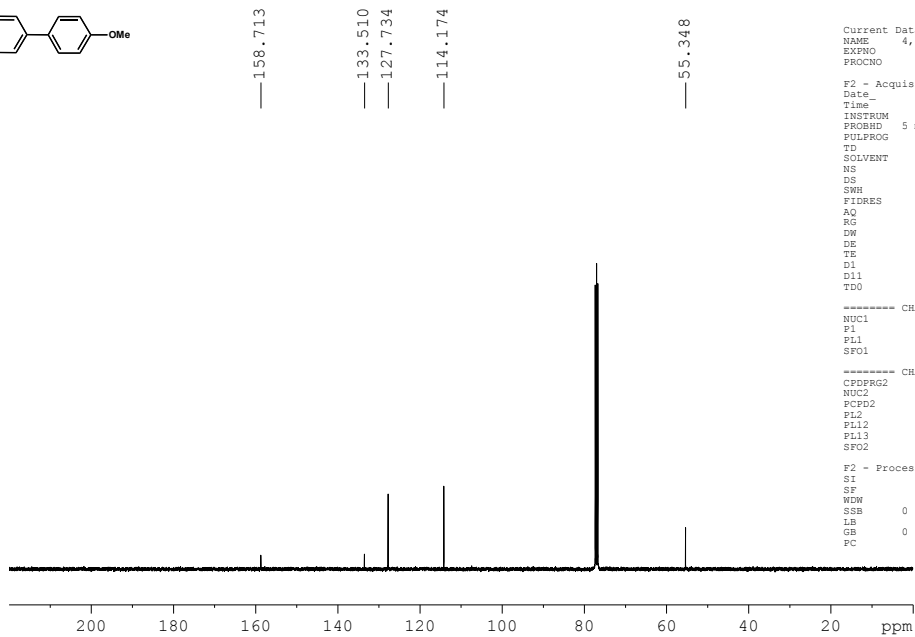

Current Data Parameters  
NAME 4,4'-dimethoxybiphenyl  
EXPNO 3  
PROCNO 1

F2 - Acquisition Parameters  
Date\_ 20141107  
Time 22.49  
INSTRUM spect  
PROBHD 5 mm BBO BB-1H  
PULPROG zgpg30  
TD 32768  
SOLVENT CDCl3  
NS 748  
DS 0  
SWH 24038.461 Hz  
FIDRES 0.733596 Hz  
AQ 0.6816452 sec  
RG 4096  
DW 20.800 usec  
DE 6.50 usec  
TE 298.9 K  
D1 2.0000000 sec  
D11 0.0300000 sec  
TDO 1

===== CHANNEL f1 =====  
NUC1 13C  
P1 10.00 usec  
PL1 6.70 dB  
SFO1 100.6233325 MHz

===== CHANNEL f2 =====  
CPDPRG2 waltz16  
NUC2 1H  
F2TD2 90.00 usec  
PL2 -5.85 dB  
PL12 9.10 dB  
PL13 12.10 dB  
SFO2 400.1316005 MHz

F2 - Processing parameters  
SI 32768  
SF 100.6127690 MHz  
WDW EM  
SSB 0  
LB 1.00 Hz  
GB 0  
PC 1.00

<sup>1</sup>H NMR (400 MHz, CDCl<sub>3</sub>, 25 °C)

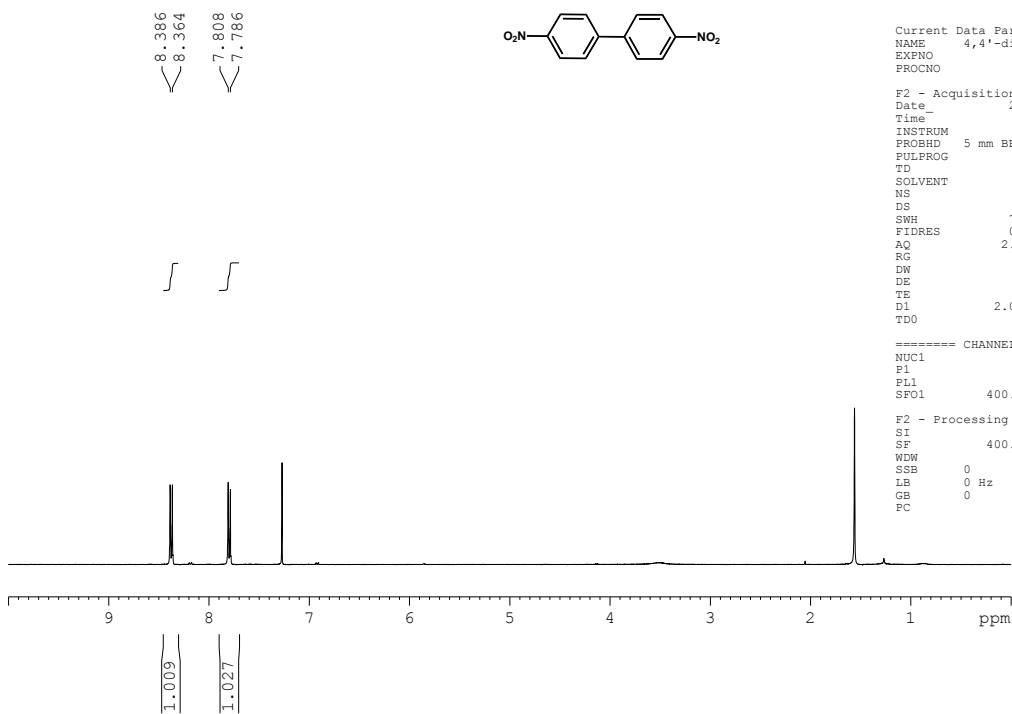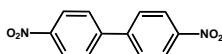

Current Data Parameters  
NAME 4,4'-dinitrobiphenyl  
EXPNO 2  
PROCNO 1

F2 - Acquisition Parameters  
Date\_ 20141114  
Time 12.53  
INSTRUM spect  
PROBHD 5 mm BBO BB-1H  
PULPROG zg30  
TD 32768  
SOLVENT CDCl3  
NS 32  
DS 0  
SWH 7246.377 Hz  
FIDRES 0.221142 Hz  
AQ 2.261110 sec  
RG 114  
DW 69.000 usec  
DE 6.50 usec  
TE 299.0 K  
D1 2.00000000 sec  
TD0 1

===== CHANNEL f1 =====  
NUC1 1H  
P1 15.00 usec  
PL1 -5.85 dB  
SFO1 400.1324008 MHz

F2 - Processing parameters  
SI 16384  
SF 400.1300051 MHz  
WDW EM  
SSB 0  
LB 0 Hz  
GB 0  
PC 1.00

<sup>13</sup>C NMR (100 MHz, CDCl<sub>3</sub>, 25 °C)

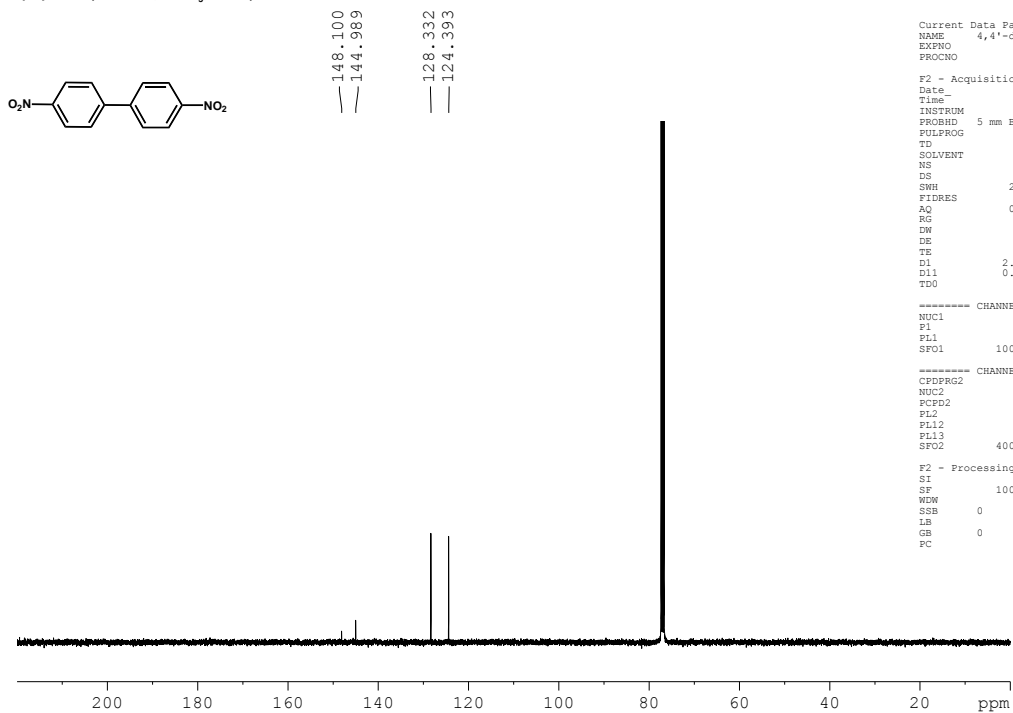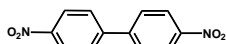

Current Data Parameters  
NAME 4,4'-dinitrobiphenyl  
EXPNO 4  
PROCNO 1

F2 - Acquisition Parameters  
Date\_ 20141122  
Time 13.47  
INSTRUM spect  
PROBHD 5 mm BBO BB-1H  
PULPROG zgpg30  
TD 32768  
SOLVENT CDCl3  
NS 1604  
DS 0  
SWH 24038.461 Hz  
FIDRES 0.733596 Hz  
AQ 0.6816452 sec  
RG 1149.4  
DW 20.800 usec  
DE 6.50 usec  
TE 298.4 K  
D1 2.00000000 sec  
D11 0.03000000 sec  
TD0 1

===== CHANNEL f1 =====  
NUC1 13C  
P1 10.00 usec  
PL1 6.70 dB  
SFO1 100.6233325 MHz

===== CHANNEL f2 =====  
CPDPRG2 waltz16  
NUC2 1H  
PCPD2 90.00 usec  
PL2 -5.85 dB  
PL12 9.10 dB  
PL13 12.10 dB  
SFO2 400.1316005 MHz

F2 - Processing parameters  
SI 32768  
SF 100.6127690 MHz  
WDW EM  
SSB 0  
LB 1.00 Hz  
GB 0  
PC 1.00

<sup>1</sup>H NMR (400 MHz, CDCl<sub>3</sub>, 25 °C)

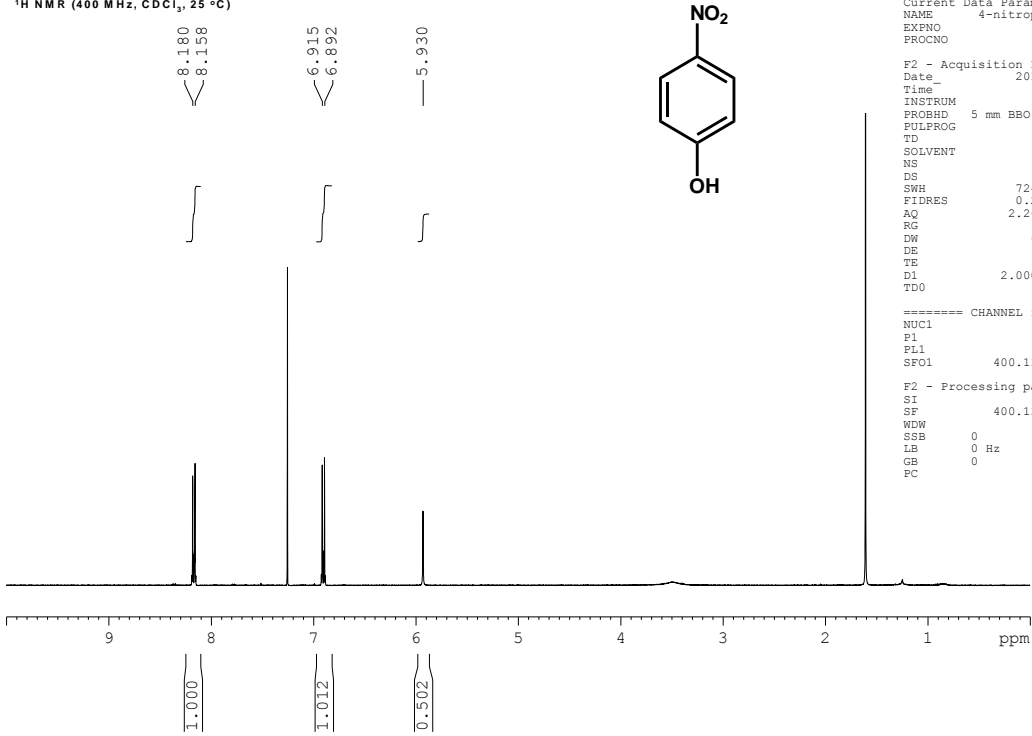

```
Current Data Parameters
NAME      4-nitrophenol
EXPNO    1
PROCNO   1

F2 - Acquisition Parameters
Date_    20141216
Time     0.22
INSTRUM  spect
PROBHD   5 mm BBO BB-1H
FULPROG  zg30
TD       32768
SOLVENT  CDCl3
NS       32
DS       0
SWH      7246.377 Hz
FIDRES   0.221142 Hz
AQ       2.2611110 sec
RG       114
DW       69.000 usec
DE       6.50 usec
TE       298.2 K
D1       2.00000000 sec
TD0      1

===== CHANNEL f1 =====
NUC1     1H
P1       15.00 usec
PL1     -5.85 dB
SFO1    400.1324008 MHz

F2 - Processing parameters
SI       16384
SF      400.1300118 MHz
WDW      EM
SSB      0
LB       0 Hz
GB       0
PC       1.00
```

<sup>13</sup>C{<sup>1</sup>H} NMR (100 MHz, CDCl<sub>3</sub>, 25 °C)

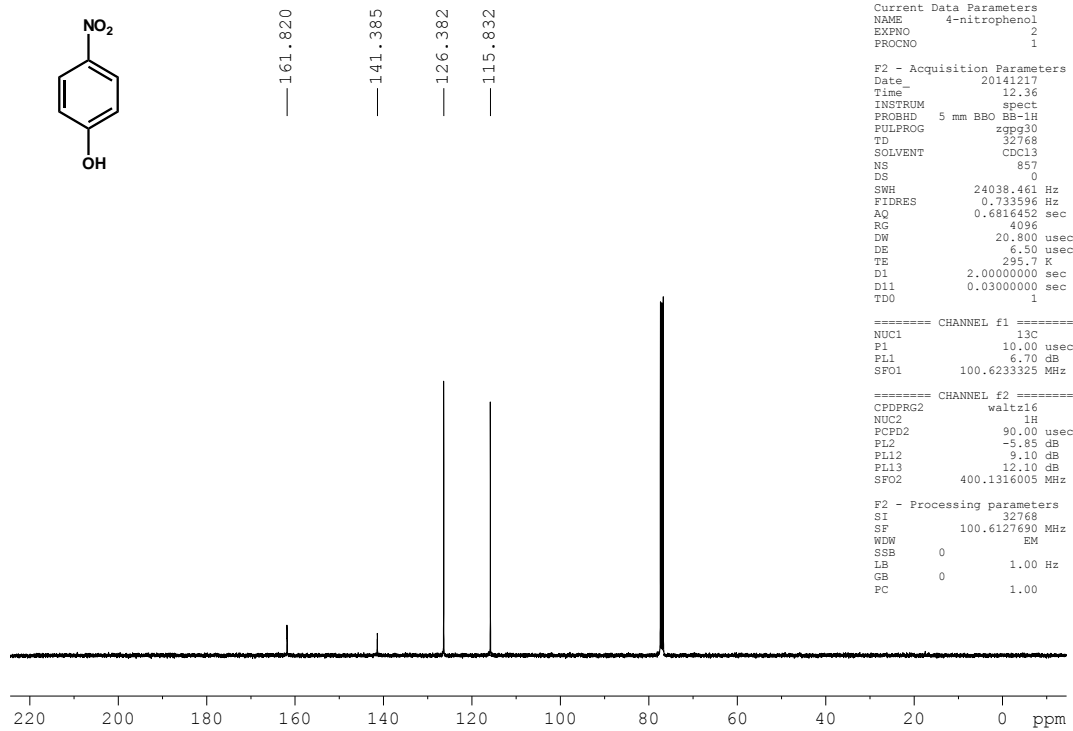

```
Current Data Parameters
NAME      4-nitrophenol
EXPNO    2
PROCNO   1

F2 - Acquisition Parameters
Date_    20141217
Time     12.36
INSTRUM  spect
PROBHD   5 mm BBO BB-1H
FULPROG  zgpg30
TD       32768
SOLVENT  CDCl3
NS       857
DS       0
SWH      24038.461 Hz
FIDRES   0.733596 Hz
AQ       0.6816452 sec
RG       4096
DW       20.800 usec
DE       6.50 usec
TE       295.7 K
D1       2.00000000 sec
D11      0.03000000 sec
TD0      1

===== CHANNEL f1 =====
NUC1     13C
P1       10.00 usec
PL1      6.70 dB
SFO1    100.6233325 MHz

===== CHANNEL f2 =====
CPDPRG2  waltz16
NUC2     1H
PCPD2   90.00 usec
PL2     -5.85 dB
PL12    9.10 dB
PL13    12.10 dB
SFO2    400.1316005 MHz

F2 - Processing parameters
SI       32768
SF      100.6127690 MHz
WDW      EM
SSB      0
LB       1.00 Hz
GB       0
PC       1.00
```
